1 **Research Article**

---

2 **A meta-analysis of transcriptomic profiles from Huntington's disease patients points to a**  
3 **pathophysiological role of CDC42, NFY, DLX1 and PRMT3**

4 Manuel Seefelder<sup>1</sup> and Stefan Kochanek<sup>1</sup>

5 <sup>1</sup> Department of Gene Therapy, Ulm University, D-89081 Ulm, Germany

6 **Corresponding author:** Manuel Seefelder. E-mail: [manuel.seefelder@uni-ulm.de](mailto:manuel.seefelder@uni-ulm.de)

7

## 8 **Abstract**

9 Description of robust transcriptomic alterations in Huntington's disease is essential to identify  
10 targets for biochemical studies and drug development. We analysed publicly available  
11 transcriptome data from the brain and blood of 220 HD patients and 241 healthy controls and  
12 identified 737 and 661 genes with robustly altered mRNA levels in the brain and blood of HD  
13 patients, respectively. In the brain, a subnetwork of 320 genes strongly correlated with HD and  
14 was enriched in transport-related genes. Bioinformatical analysis of this subnetwork  
15 highlighted CDC42, PAK1, YWHAH, NFY, DLX1, HMGN3, and PRMT3. Moreover, we  
16 found that CREB1 can regulate 78.0 % of genes whose mRNA levels correlated with HD in the  
17 blood of patients. Alterations in protein transport, metabolism, transcriptional regulation, and  
18 CDC42-mediated functions are likely central features of HD. Further our data substantiate the  
19 role of transcriptional regulators that have not been reported in the context of HD (e.g. DLX1,  
20 HMGN3 and PRMT3) and strongly suggest dysregulation of NFY and its target genes across  
21 tissues. A large proportion of the identified genes such as CDC42 were also altered in  
22 Parkinson's (PD) and Alzheimer's disease (AD). The observed dysregulation of CDC42 and  
23 YWHAH in samples from HD, AD and PD patients indicates that those genes and their  
24 upstream regulators may be interesting therapeutic targets.

25 **Keywords:** Huntingtin / neurodegeneration / weighted gene co-expression network analyses /  
26 robust rank aggregation analysis

## 27 **Introduction**

28 Huntingtin (HTT) functions in diverse cellular processes such as autophagy, endocytosis,  
29 vesicle transport, and transcriptional regulation [1]. A triplet repeat expansion in exon 1 of the  
30 HTT gene results in the expansion of an N-terminal polyglutamine tract and causes  
31 Huntington's disease (HD) [2]. Clinically, a progressive loss of motor functions, cognitive  
32 impairment, and psychiatric symptoms such as depression and anxiety [3] characterises HD.  
33 Besides neurological symptoms, HD patients suffer from a plethora of non-neuronal symptoms  
34 such as cardiac failure, muscle atrophy, impaired glucose tolerance, osteoporosis, weight loss,  
35 and testicular atrophy [4].

36 Expansion of the N-terminal polyQ tract impairs the multi-faceted function of HTT and its  
37 interaction with numerous other proteins [5,6]. Mutant huntingtin (mHTT), for instance,  
38 induces the activation of microglia, leading to increased secretion of interleukin-1 $\beta$  (IL-1 $\beta$ ),  
39 tumour necrosis factor-alpha (TNF) and increased levels of reactive oxygen and nitrogen  
40 species [7]. Tabrizi et al. and Fan and Raymond showed that mHTT impairs the glutamate  
41 uptake in astrocytes leading to excitotoxicity [8,9]. Aberrant splicing of the mHTT mRNA  
42 results in the formation of a truncated HTT exon-1 protein forming nuclear and cytoplasmic  
43 inclusions [10]. R6/2 mice with a knock-in of exon-1 of human HTT show a more severe  
44 disease progression than mouse models with a knock-in of full-length mutant HTT [10]. The  
45 study of several huntingtin-interaction partners and their impaired function in HD further  
46 suggested impaired trafficking of clathrin-coated and non-coated vesicles in HD patients  
47 [11,12]. Transcriptomic studies of HD patients, cell lines, and mouse models expressing mHTT  
48 observed transcriptional dysregulation of a plethora of genes [13–19] such as differential  
49 regulation of genes involved in neuronal differentiation [14,16], heat shock response [13],  
50 mRNA processing [20], immune response and neuroinflammation [14]. Several mechanisms  
51 behind the broad transcriptional dysregulation such as altered expression of enhancer RNAs

52 [21], sequestration of transcription factors (e.g. CREB1, TBP, or mSin3a) [22–25], or the  
53 sequestration of proteins such as the muscleblind-like splicing regulator 1 (MBNL1), nucleolin,  
54 and proteins of the small interfering RNA (siRNA) machinery [26,27] have been discussed.

55 Previously published analyses of transcriptomic profiles from HD patients [13–19] yielded  
56 varying results. Since a thorough knowledge of pathological mechanisms behind HD is  
57 essential for the design of further biochemical studies and development of therapies, we  
58 performed a meta-analysis of publicly available transcriptomic data from HD patients to  
59 identify genes altered in several studies. Within our meta-analysis, we found 661 and 737 genes  
60 with robustly altered mRNA levels in the blood and brain of HD patients, respectively. Strongly  
61 suggesting that dysfunction in protein transport and metabolism are central in HD, we identified  
62 by weighted gene co-expression network analysis a subnetwork of 320 genes, enriched in genes  
63 functioning in protein transport that strongly correlated with HD in the brain. Additionally, we  
64 identified the cell division cycle 42 (CDC42), p21 (CDC42 / RAC1) Activated Kinase 1  
65 (PAK1), 14-3-3 protein eta (YWHAH), and protein phosphatase-2 catalytic subunit  $\alpha$  (PP2CA)  
66 as hub genes of this subnetwork. Transcription factor enrichment analysis (TFEA) highlighted  
67 distal-less homeobox 1 (DLX1), high mobility group nucleosomal binding domain 3  
68 (HMGN3), and protein arginine methyltransferase 3 (PRMT3) in this subnetwork. A signature  
69 of 74 and 41 genes, including CDC42 and YWHAH, were also altered in the brain of PD (Figure  
70 5 and Additional file 7) and in AD and PD patients, respectively. Similarly, a subnetwork of  
71 118 genes, including genes coding for constituents of the Arp2/Arp3 complex, were  
72 significantly altered in the blood of HD patients. Strikingly, 78.0% of the genes in this blood  
73 subnetwork were direct or indirect targets of CREB1.

## 74 **Results**

### 75 **Transcriptional changes in the brain of HD patients**

76 Since neurological and neuropsychiatric symptoms are the pathognomonic features of HD and

77 possess a high disease burden for HD patients, several transcriptomic studies investigated  
78 transcriptional changes in the brain of HD patients. In this meta-analysis, we included three  
79 published transcriptomic studies using post-mortem brain tissue from the prefrontal cortex  
80 (NCBI accession number: GSE33000 and GSE64810) [14,16] and the caudate nucleus of  
81 prodromal HD patients (NCBI accession number GSE129473) [13] (Table 1). As described  
82 above, this meta-analysis aimed at identifying promising candidates for further functional  
83 studies and improving our understanding of transcription factors and mechanism, which are  
84 mainly affected in the brain of HD patients.

85 To identify genes with significantly altered mRNA levels in those three studies, we determined  
86 differentially expressed genes for each study separately, ranked them after their absolute Z-ratio  
87 and performed a robust rank aggregation analysis (RRA). Thereby, we identified 737  
88 differentially expressed genes (RRA score < 0.05) that were among the most altered genes in  
89 the analysed datasets (Additional file 1).

90 Based on all genes identified by RRA (Additional file 1), we performed a weighted gene co-  
91 expression analysis (WGCNA) to identify gene modules, i.e. clusters of highly correlated  
92 genes. Adjacency and the topological overlap matrix (TOM) for the gene network were  
93 calculated with a soft-thresholding power  $\beta$  of 14.5 for which the WGCNA network satisfies  
94 the criterion of scale-free topology ( $R^2 = 0.85$ ) (Additional file 2). By module-based clustering  
95 with the diagonal, varying volume, and shape model (VVI), we identified nine modules of  
96 which the module eigengenes (first principal component) of seven modules (black, blue, red,  
97 brown, magenta, and turquoise) statistically significantly correlated with disease state (HD  
98 patients versus healthy individuals) as determined by correlation analysis (Figure 1A).  
99 Corroborating a potential link between genes in the black, brown and turquoise modules with  
100 HD, we found a positive and statistically significant correlation between module membership,  
101 defined as the probability that a gene belongs to this module, and gene significance, defined as

102 the correlation between the expression values and the trait of interest, of 0.46 ( $p = 0.004$ ), 0.47  
103 ( $p = 1e-04$ ), and 0.41 ( $p = 0.008$ ), respectively (Figure 1A). Additionally, genes belonging to  
104 the black and brown module showed a high mean gene significance (Figure 1B). In contrast,  
105 indicating that transcriptomic alterations of genes of the turquoise modules were less  
106 pronounced than the genes of the black and brown module, we observed a low mean gene  
107 significance of genes of this module. Corroborating the results of our network analysis, we  
108 found that most of the identified genes or proteins are known to interact with several other  
109 proteins belonging to the same module. For instance, according to the network analysis in  
110 GeneMania, 94.05% and 94.11% of the genes are known to be co-expressed in humans.  
111 Likewise, network analysis using the STRING database (confidence cut-off = 0.4) [28] showed  
112 that 34 of 53 proteins (64.2%) of the black and 36 of 81 proteins (44.4%) of the brown module  
113 interact with at least one other protein (data not shown).

114 Based on the clustering analysis of the modules eigengenes (Figure 1C) and the similarity of  
115 the eigengene adjacency (Figure 1D), we grouped the observed modules in three meta-modules:  
116 the first meta-module (M1) consisted of the black, blue, magenta, and red module, the second  
117 meta-module (M2) consisted of the brown, green and turquoise module, and the third meta-  
118 module (M3) consisted of the yellow and pink module. Combining the identified WGCNA  
119 modules to meta-modules and subsequent analysis of this meta-modules demonstrated a high  
120 correlation with HD (correlation  $r = 0.5$ ,  $p$ -value =  $1e-38$ ), a positive correlation between gene  
121 significance and module membership of 0.73 ( $p$ -value =  $2e-54$ ), and the highest mean gene  
122 significance of all meta-modules for M1 (Figure 2A and B). Corroborating the importance of  
123 genes belonging to M1, the eigengene and adjacency of M1 clustered together with the disease  
124 state (Figure 2C and D). According to STRING, protein-protein interactions were strongly  
125 enriched in M1 (826 observed edges, 602 expected edges, and  $p < 1.0e-16$ ) at minimal  
126 interaction confidence of 0.4. While the eigengene of M2 correlated with HD, we could not  
127 observe a positive correlation between gene significance and module membership and,

128 therefore, did not analyse this meta-module further.

129 Owing to the high similarity between modules of the same meta-module, we performed the  
130 transcription factor enrichment analysis (TFEA) and the subsequent GO-term enrichment  
131 analysis on the meta-modules M1 instead of single modules (Figure 3A-D). Characterising  
132 functional enrichment of genes belonging to the M1 subnetwork, we performed enrichment  
133 analyses against the gene ontology (GO) and Reactome database. Using the GO database, we  
134 found an enrichment of genes involved in protein transport (GO: 0015031, 12.8 % of genes in  
135 M1 and FDR = 0.046) (Figure 3A) such as the Ras-related proteins 11A (RAB11A), 2A  
136 (RAB2A), 14 (RAB14), syntaxin-7 (STX7), syntaxin-12 (STX12), or the sorting nexin 3  
137 (SNX3) in M1. Among the three datasets, the 41 proteins that belonged to M1 and function in  
138 protein transport processes showed a strong up-regulation in HD patient samples with a median  
139 Z-ratio of 1.51 (Figure 3B). To also include genes with lower Z-ratios into the functional  
140 enrichment analyses, irrespective of their module membership, we additionally conducted gene  
141 set enrichment analysis (GSEA) of the three datasets independently. Strongly suggesting that  
142 the alteration of genes involved in protein transport may be relevant in HD, we found a strong  
143 enrichment of proteins involved in the co-translational protein targeting to the membrane in all  
144 three datasets by GSEA (Figure 3E). Additionally, genes functioning in cellular metabolic  
145 processes (GO:0044237, 56.3 % of genes in M1 and FDR = 0.023), cellular respiration  
146 (GO:0045333, 3.4 % of genes in M1 and FDR = 0.027) and translation (GO:0006412, 5.6 % of  
147 genes in M1, and FDR = 0.023) were statistically significantly enriched in the M1 subnetwork.  
148 Similarly, when using the Reactome database, we observed a strong enrichment of proteins  
149 involved in protein metabolism, gene expression (transcription) and post-translational protein  
150 modification (Figure 3D). Using the network enrichment analysis test (NEAT), we found a  
151 highly statistically significant over-enrichment of 38 KEGG pathways in M1 (Additional file  
152 3). Among these enriched pathways were “SNARE interaction in vesicular transport” (adjusted  
153 p-value = 1.74e-33), “RNA transport” (adjusted p-value = 2.10E-217), and “mRNA

154 surveillance pathway” (adjusted p-value = 9.63E-60) (Additional file 3).

155 To identify highly connected genes within the M1 subnetwork, we computed hub genes, i.e.  
156 genes with high intramodular connectivity, gene significance and module membership (Table  
157 2, Additional file 4). Among these hub genes was CDC42 (Z-ratios: 1.72; 1.83; 1.45 in  
158 GSE33000, GSE129473 and GSE64810 respectively), a membrane-associated small GTPase  
159 that interacts with several effector proteins and thereby regulates cell migration [29], the bipolar  
160 attachment of spindle microtubules to kinetochores [30], the extension and maintenance of the  
161 formation of filopodia, the dedicator of cytokinesis 10 (DOCK10) mediated spine formation  
162 [31], and the structural plasticity of dendritic spines [31]. Further corroborating the importance  
163 of CDC42 in the subnetwork correlating with HD, CDC42 was additionally central in the M1  
164 protein-protein interaction network, constructed using the STRING database (Additional file  
165 5). Together with CDC42, we identified 18 proteins with altered mRNA levels in all datasets  
166 that were directly connected with CDC42 according to the STRING database. Further, CDC42  
167 interacts with other identified hub proteins such as the P21/Cdc42/Rac1-Activated Kinase 1  
168 (PAK1) [32], 14-3-3 protein eta (YWHAH), or the protein phosphatase 2 catalytic subunit  $\alpha$   
169 (PPP2CA). mRNA levels of the CDC42 small effector 2 (CDC42SE2), that functions  
170 downstream of CDC42, was upregulated in the brain of HD patients (Z-ratios: 2.17; 0.97; 1.2).  
171 Additionally, CDC42 can interact with the CDC42-interacting protein 4 (CIP4), also known as  
172 thyroid hormone receptor interactor 10 (TRIP10) and HTT [33,34] that was not robustly  
173 dysregulated in our meta-analysis (Z-ratios -1.35, -0.03, 0.51). Besides the interaction of  
174 CIP4/TRIP10 with HTT and CDC42, CIP4/TRIP10 can interact with the vesicle-associated  
175 membrane protein 2 (VAMP2) and 7 (VAMP7) which are linked with other genes robustly  
176 altered in the brain of HD patients such as the vesicle-associated membrane protein 1 (VAMP1)  
177 and the Ras-related Protein Rab-14 (RAB14) [35].

178 In addition, we identified PAK1 (Z-ratios: 2.07; -0.42; 0.299), which can interact with CDC42,



179 as a hub gene in the M1 subnetwork. Additionally, the PAK1 Interacting Protein 1 (PAK1IP1),  
180 which inhibits the activation of PAK1 by CDC42 through its interaction with the N-terminus  
181 of PAK1 (Xia et al, 2001), was upregulated in the brain of HD patients in all studies (Z-ratios:  
182 1.88; 1.10; 1.98). Since PAK1, as well as PAK2 and PAK3, belong to the group A PAKs [36],  
183 we also analysed mRNA levels of other group A PAKs. While PAK2 was not robustly altered  
184 in the brain of HD patients (Z-ratios: -1.43; 1.31; 0.7), PAK3 mRNA levels (Z-ratios: 1.98;  
185 0.46; 0.70) were slightly elevated in the brain of HD patients, although it was not identified by  
186 RRA ( $p = 0.10$ ). Both CDC42 and PAK1 are interacting with another hub gene, the protein  
187 phosphatase 2 catalytic subunit alpha (PPP2CA) (Z-ratios: 1.98; 0.74; 1.91), which is an  
188 important phosphatase for microtubule-associated proteins. PPP2CA was additionally the most  
189 central protein in the network analysis of the M1 protein-protein interaction network  
190 (Additional file 5).

191 Broad transcriptional dysregulation in HD was often linked to direct interaction of mHTT with  
192 proteins of the small interfering RNA (siRNA) machinery [22–27] and different transcriptional  
193 regulators such as CREB1, TBP, mSin3a, MBNL1, nucleolin, histone deacetylases (HDACs),  
194 or the DNA methyltransferase 1 (DNMT1). Therefore, we performed a transcription factor  
195 enrichment analysis (TFEA) of the M1 subnetwork to define which transcription factors would  
196 best explain the observed alterations in the brain of HD patients. Analysis of the target genes  
197 of the top five TFEA hits, the mitochondrial transcription termination factor 3 (MTERF3),  
198 Myb/SANT DNA binding domain containing 4 with coiled-coils (MSANTD4), small nuclear  
199 RNA activating complex polypeptide 5 (SNPAC5), zinc finger protein 833 (ZNF833), and  
200 thymocyte nuclear protein 1 (THYN1), showed that most of their target genes were upregulated  
201 in the brain of HD patients (Figure 4 and Additional file 6). mRNA levels of MTERF3,  
202 MSANTD4, SNPAC5, ZNF833 and THYN1 were not consistently altered in the brain of HD  
203 patients. Alongside with the mRNA levels of their target genes, mRNA levels of the distal-less  
204 homeobox 1 (DLX1) (regulates 11.9 % of M1, TFEA rank = 6, Z-ratios: 2.21; 0.16; 1.04),

205 protein arginine methyltransferase 3 (PRMT3) (regulates 11.6 % of M1, TFEA rank = 14, Z-  
206 ratios: 0.46; 2.65; 1.11), and nuclear transcription factor Y subunit  $\beta$  (NFYB) (regulates 29.7  
207 % of M1, TFEA rank = 24, Z-ratios: 1.05; 2.39; 2.02) were robustly upregulated in the brain of  
208 HD patients (Figure 4 and Additional file 6). Additionally, mRNA levels of the high mobility  
209 group nucleosomal binding domain 3 (HMGN3) (regulates 24.1 % of M1, TFEA rank = 13, Z-  
210 ratios: -0.91; 1.90; 1.77), that was additionally ranked high in the TFEA, appeared to be  
211 upregulated in only two of three studies and slightly downregulated in the other study  
212 (Additional files 1 and 6). Strikingly, we noted that transcription factors that have previously  
213 been shown to be affected by mHTT such as CREB1 (rank 182) or TBP (rank 208) were ranked  
214 low or could not be detected at all (mSin3a) by TFEA.

215 Besides the effects of mHTT on transcription factors, previous publications indicated that the  
216 dysregulation of epigenetic modifiers such as DNMT1 or histone deacetylases (HDACs)  
217 (Federspiel et al, 2019; Siebzehnrübl et al, 2018; Moreno et al, 2016) might contribute to the  
218 broad transcriptional dysregulation in HD. In our meta-analysis, HDCA2 (Z-ratios: 0.69, 1.84,  
219 1.86) and HDAC9 (Z-ratios: 2.26, 0.88, 1.42) were upregulated in the brain of HD patients,  
220 while the histone deacetylase 5 (HDAC5) mRNA levels were decreased (Z-ratios: -0.18; -2.17;  
221 -2.02). By RRA, we did not identify DNMT1, DNMT3A, or DNMT3B as robustly altered  
222 genes. Nonetheless, we noted a downregulation of DNMT1 (Z-ratio 0.48; - 1.35, -1.72) and  
223 DNMT3A (Z-ratio: 0.54, -1.38, -2.20) in datasets from Agus et al. 2019 and Labadorf et al.,  
224 while both, DNMT1 and DNMT3A, were slightly upregulated in the larger dataset from  
225 Narayanan et al., 2014. DNMT3B (Z-ratio: - 0.76; -0.31; -0.79) was mostly unaltered in the  
226 brain of HD patients in all datasets.

227 Taken together, mRNA levels of 320 genes of the M1 co-expression network strongly  
228 correlated with HD and genes involved in protein transport and metabolism was enriched in  
229 this co-expression subnetwork (Figure 3A, B and D). CDC42, PAK1, YWHAH and PP2CA

230 were identified as hub genes of this network. Especially substantiating on the relevance of  
231 CDC42, CDC42 has been indirectly linked with HD before [34] and can indirectly or directly  
232 interact with other identified hubs and 18 other proteins with robustly altered mRNA levels in  
233 the brain of HD patients. Further, the TFEA of the M1 subnetwork highlighted DLX1, NFY  
234 and HMGN3 as potential transcriptional regulators whose function might be affected in the  
235 brain of HD patients. mRNA levels of several epigenetic modifiers such as HDAC2, HDAC9,  
236 DNMT1, and DNMT3A were additionally altered in at least two of the three studies using HD  
237 brain samples.

238 **A large proportion of differentially regulated genes in the brain of HD patients were also**  
239 **altered in Alzheimer's and Parkinson's disease**

240 Previous transcriptomic studies have identified common transcriptional patterns between  
241 Alzheimer's disease (AD) and Parkinson's disease (PD) [37] and between AD and HD [16].  
242 Hence, we compared the list of robustly altered genes in the brain of HD patients with the results  
243 of a previous meta-analyses comparing transcriptional alterations in PD and AD [37]. Of the  
244 737 genes with robustly altered mRNA levels in the brain of HD patients, that were identified  
245 by RRA, 74 genes were also differentially expressed in PD and 41 genes were altered in all  
246 three neurodegenerative diseases (Additional file 7). Strikingly, alterations of mRNA levels of  
247 these genes were mostly reciprocal between HD and AD or PD, i.e. genes with an elevated  
248 mRNA level in the brain of HD patients showed decreased mRNA levels in the brain of AD or  
249 PD patients.

250 Analysing of the co-expression networks demonstrated that 100 % of these 74 genes were  
251 annotated as co-expressed in the GeneMania database (Figure 5A). 41 proteins whose mRNA  
252 levels were altered in HD and PD have at least one annotated interaction partner (Figure 5B).  
253 While PPP2CA, YWHAH, RAB11A and CDC42 which have been identified as hub genes /  
254 proteins in the M1 subnetwork network were also all central in the protein-protein interaction

255 network (Figure 5B and Additional file 5) of genes differentially expressed upon HD and PD,  
256 only YWHAH was also central in the constructed co-expression network (Figure 5A and  
257 Additional file 5).

### 258 **Transcriptional changes in the blood of HD patients**

259 As afore-described, HTT is ubiquitously expressed and HD symptoms are not confined to the  
260 central nervous system [1,4]. Hence, we additionally analysed transcriptomic studies of blood  
261 samples from HD patients and healthy controls (Table 1). Borovecki et al. 2005 (GSE1751)  
262 analysed the transcriptomic profile of twelve symptomatic and five presymptomatic HD  
263 patients in comparison to 14 healthy controls, whereas Hu et al. 2011 (GSE24520) included  
264 venous cellular whole blood samples from 6 healthy controls and 8 HD patients. Transcriptomic  
265 profiles of lymphocytes from 12 moderate stage HD patients and 10 age-matched healthy  
266 controls were analysed by Runne et al. 2007 (GSE8762).

267 By robust rank aggregation (RRA), we identified 661 genes differentially expressed upon HD  
268 among the three datasets ( $p < 0.05$ ) (Additional file 1). Based on those 661 genes with a soft-  
269 thresholding power  $\beta = 19.5$  (scale-free topology  $R2 = 0.87$ ) (Additional file 2) and subsequent  
270 module-based clustering with the diagonal, equal volume, varying shape (EVI) model, we  
271 identified nine WGCNA modules. Of these modules, the module eigengene of three modules  
272 (brown, pink, and yellow) statistically significantly correlated with the disease state (healthy  
273 individuals versus HD) (Figure 6A). While genes of the brown module showed a negative  
274 correlation between module membership and gene significance, genes of the pink and yellow  
275 modules showed a positive correlation (Figure 6A). Corroborating the importance of genes of  
276 the pink and yellow modules, genes of these modules showed the highest mean gene  
277 significance of all identified modules (Figure 6B). Further, 94.12 % and 86.55 % of the genes  
278 belonging to either the pink or yellow module were annotated by GeneMania to be co-expressed  
279 in humans. Owing to the low distance between the modules eigengenes of the pink and yellow

280 modules (Figure 6C) and the highly similar adjacency of these modules (Figure 6D), we  
281 combined these modules for further downstream analysis and will further refer to this module  
282 as the blood meta-module (MB).

283 Like the enrichment of the meta-module M1 identified in the brain samples, we found a strong  
284 enrichment of proteins involved in transport (FDR = 0.03 and 35.6 % of all genes in MB) and  
285 metabolic processes (FDR = 0.03 and 66.9 % of all genes in MB) in the MB subnetwork (Figure  
286 7A and B). Consistent with the enrichment of proteins involved in protein transport, we found  
287 a strong enrichment of proteins localised to endosome membranes (FDR = 0.002 and 9.3 % of  
288 genes in MB) (Figure 7C). Among the 11 proteins localised to endosome membranes were the  
289 vesicle-associated membrane protein 7 (VAMP7) (Z-ratios -1.47; 0.99; 3.3), a paralog of  
290 VAMP2 that also displayed altered mRNA levels in the brain, and the sorting nexin 10 (SNX10)  
291 that is involved in membrane trafficking and protein sorting [38]. Additionally, we observed  
292 dysregulation of the actin-related proteins ACTR2/Arp2 (Z-ratio: -0.95; -1.75; 3.15),  
293 ACTR3/Arp3 (-1.92; -1.62; 2.78), and ARPC5 (-1; -1.87; 2.24) that together with ARBC1A,  
294 ARBC1B, ARPC3, and ARPC4 form a seven-subunit protein complex playing an essential role  
295 in the regulation of the actin cytoskeleton [39]. By analysis of the MB protein-protein  
296 interaction network, ACTR2 was the most important hub protein, which strongly substantiates  
297 on its pathophysiological relevance in HD. Further indicating that transcriptional dysregulation  
298 of regulators of the actin cytoskeleton may be important in HD, other actin-related proteins such  
299 as ACTR3B (Z-ratios: 1.3; 1.30; 1.62), ACTR6 (1.38; 1.54; 1.88) and ACTR10 (Z-ratios: 1.64;  
300 1.23; 1.34) were robustly upregulated in the blood of HD patients according to this meta-  
301 analysis. The alteration of mRNA levels of constituents of the Arp2/3 complex and actin-related  
302 proteins further substantiates on the identification of CDC42 as an important hub gene in the  
303 brain since CDC42 can activate the Arp2/3 complex through Wiskott-Aldrich syndrome  
304 proteins [40] such as WAS, WASF1, WASF2, WASF3, and WASL that appeared to be neither  
305 robustly altered in the brain nor in the blood of HD patients.

306 To identify transcription factors that can regulate the transcription of genes belonging to MB,  
307 we performed a TFEA (Additional file 6). The CGG Triplet Repeat Binding Protein 1  
308 (CGGBP1), zinc finger protein 654 (ZNF654), forkhead box N2 (FOXN2), and the specificity  
309 protein 3 transcription factor (SP3) were ranked at the top in the TFEA. Strikingly, transcription  
310 of these transcriptional regulators is regulated by the cAMP-responsive element-binding  
311 protein-1 (CREBP1). CREB1 was also ranked high (rank 15) in the TFEA and can regulate the  
312 transcription of genes coding for constituents of the Arp2/3 complex and hub genes of the MB  
313 subnetwork such as membrane-associated ring-CH-type finger 7 (MARCH 7), pumilio RNA  
314 binding family member 2 (PUM2), survival motor neuron domain containing 1 (SMNDC1), or  
315 zinc finger DHHC-type palmitoyltransferase 17 (ZDHHC17), also known as the huntingtin-  
316 interacting protein 14 (HIP14). CREB1 together with the other enriched transcription factors  
317 regulated by CREB1 (TET2, SP3, RLF, CGGBP1, ZNF148, FOXN2, ZNF654, ZBTB11, and  
318 ZNF770) regulates the transcription of 92 from 118 (78.0 %) genes belonging to MB  
319 (Additional file 8).

320 Taken together, the enrichment of proteins localised to endosome membranes further  
321 corroborates the above-described alteration of protein-transport-related genes in the brain of  
322 HD patients. The dysregulation of several constituents of the Arp2/3 complex, that is activated  
323 by CDC42, substantiates on the relevance of actin cytoskeleton dysregulation in HD.

### 324 **52 genes were differentially regulated in the blood and brain of HD patients**

325 As noted before, the ubiquitous expression of HTT [1] and the clinical manifestation of HD  
326 outside the central nervous system [4] indicates that transcriptomic changes caused by polyQ  
327 expansion of HTT may be not confined to nervous tissues. According to our meta-analysis, 52  
328 genes were dysregulated in brain- and blood-derived samples from HD patients (Additional file  
329 1).

330 Based on the genes/proteins altered in the blood and brain of HD patients, we constructed a

331 protein-protein interaction network (Figure 8) to investigate the relationship between the  
332 identified genes. Furthermore, to identify transcription factors that might explain the observed  
333 transcriptomic alterations, we conducted a transcription factor enrichment analysis. While  
334 82.4 % of the proteins were annotated as co-expressed by GeneMania (data not shown), 48.1 %  
335 were interacting with a least one other protein according to the STRING databases (interaction  
336 cutoff: 0.4).

337 In our meta-analysis, we noted that mRNA levels of the zinc finger DHHC-Type  
338 palmitoyltransferase 13 (ZDHHC13), i.e. huntingtin-interacting protein 14 (HIP14), and the  
339 zinc finger DHHC-Type palmitoyltransferase 17 (ZDHHC17), i.e. huntingtin-interacting  
340 protein 14-like protein (HIP14L) were mostly elevated in the blood and brain of HD  
341 patients. Previous studies linked the altered interaction between mHTT and ZDHHC17 and  
342 ZDHHC13 with altered regulation of the striatal N-Methyl-D-Aspartate Receptor (NMDA)  
343 trafficking [41].

344 TFEA analysis of the 52 genes altered in the blood and brain of HD samples highlighted the  
345 enrichment of NFY target genes (rank 3) (Additional file 6). NFY is a trimeric complex of  
346 proteins coded by the NFYA, NFYB, and NFYC genes. Besides the high ranking of NFYB in  
347 the combined dataset (rank 3), targets of NFYB were also enriched in the M1 (brain, rank 24)  
348 and the blood (rank 48) (Additional file 6). Moreover, NFYB (Z-ratios in the brain datasets:  
349 1.05, 2.39, 2.02) mRNA-levels and NFYB target genes (mean Z-ratio: 1.62) were also  
350 increased in the brain of HD patients (Figure 5 and Additional file 1).

### 351 **HMGN3, NFY and CDC42 mRNA were additionally altered in the striatum of YAC128** 352 **and R6/2 mice and predictive for HD**

353 To further substantiate on the relevance of identified hub genes or transcriptional regulators  
354 such as CDC42, PAK1, YWHAH, DLX1, HMGN3, or NFY, we analysed transcriptomic  
355 alterations in the striatum of R6/2 [42] and YAC128 mice [43] (Additional file 9). Furthermore,

356 we assessed how accurate control and HD mice can be discriminated based on mRNA levels of  
357 these genes (Additional file 10 and 11).

358 Indicating that NFY may play a role in HD across tissues, TFEA of the subnetworks M1 and  
359 MB and the combined dataset highlighted NFY. Like in human HD patients, NFYA (Z-ratios:  
360 1.75, 0.77, 1.93 in R6/2, 12-month-old YAC128, and 24-month-old YAC128 mice  
361 respectively) and NFYB (Z-ratios: 1.31, 0.45, 1.38) mRNA levels were elevated in R6/2 and  
362 YAC128 mice. Additionally, control and HD mice could be well discriminated based on NFYA  
363 (AUC = 0.86; 95% CI = [0.71, 1]), and NFYB (AUC = 0.79; 95% CI = [0.60, 0.98]) mRNA  
364 levels (Additional files 8 - 10).

365 In contrast, HMGN3 was only highlighted by TFEA of the M1 module, correlating with HD in  
366 the brain, and not in the blood datasets which may imply that dysregulation of HMGN3 may be  
367 confined to the brain In R6/2 and YAC128 mice, HMGN3 mRNA levels were elevated (Z-  
368 ratios: 1.89, 0.78, 2.06) in HD mice and control and HD mice could be well discriminated based  
369 on the HMGN3 mRNA levels. (AUC = 0.89; 95% CI = [0.76, 1]) (Additional files 8 - 10).

370 In concert with a more pronounced HD phenotype in 24-month YAC128 and R6/2 mice than  
371 in 12-month-old YAC128 mice, the increase of HMGN3, NFYA, and NFYB mRNA levels  
372 positively correlated with the age of YAC128. This raises the possibility that HMGN3, NFYA,  
373 and NFYB mRNA levels might be utilised as markers for disease progression and severity.  
374 However, further investigations on the usability of those genes as biomarkers in larger patient  
375 cohorts are required. Further, it should be clarified whether alteration of mRNA levels HMGN3,  
376 NFY, their target genes are specific for HD or whether they are present in other  
377 neurodegenerative diseases.

378 DLX1 and PRMT3 mRNA levels, which were both also highlighted by TFEA, were only  
379 elevated in the striatum of R6/2 mice but appeared to be unaffected in YAC128 mice. Like in  
380 the brain samples of HD patients, we observed a robust downregulation of DNMT3A (Z-ratios:



381 - 1.24, -1.79, - 1.14) in the striatum of R6/2 and YAC128 mice and the mice could be  
382 discriminated based on DNMT3A levels (AUC = 0.83; 95% CI = [0.66, 0.99]). In disagreement  
383 with the analysis of brain samples from HD patients, DNMT1 and DNMT3B levels were not  
384 consistently altered in the striatum of R6/2 and YAC128 mice.

385 Further corroborating the importance of CDC42 dysregulation in HD, CDC42 mRNA levels  
386 were elevated in the striatum of R6/2 and YAC128 (Z-ratios: 1.24, 1.18, 1.88). Additionally,  
387 control and HD mice could be discriminated based on CDC42 mRNA levels (AUC = 0.85; 95%  
388 CI = [0.68, 1]). mRNA level of PAK1, that was identified as a hub gene in the M1 subnetwork  
389 and correlated with HD, was merely elevated in YAC128 mice (Z-ratios: 1.47, 2.08), but was  
390 mostly unaffected in R6/2 mice (Z-ratio: - 0.45).

## 391 **Discussion**

392 In our meta-analysis, we intended to identify by RRA, WGCNA and network analysis robust  
393 transcriptomic changes underlying HD. To this end, we included transcriptomic studies  
394 analysing different human brain regions and tissues from symptomatic and prodromal HD  
395 patients. Thereby, we identified subnetworks of 320 (M1) or 118 (MB) genes with robustly  
396 altered mRNA levels in the brain and blood of HD patients, respectively. Network analysis of  
397 differentially expressed genes in the brain highlighted CDC42, PAK1, YWHAH, and PP2CA  
398 as hub genes of the M1 subnetwork. Additionally, we identified a signature of 74 and 41 genes,  
399 including CDC42 and YWHAH, that were altered in the brain of PD and HD (Figure 5 and  
400 Additional file 7) and AD, PD and HD patients, respectively. In the blood, we identified a  
401 subnetwork of 118 genes, including genes coding for several constituents of the Arp2/3  
402 complex that is activated by CDC42. TFEA highlighted the relevance of several already  
403 described (e.g. CREB1 and NFY) or novel (e.g. DLX1, PRMT3 and HMGN3) transcription  
404 factors that may play a role in HD. In conclusion, our analysis suggests that dysregulation of  
405 transcription factors and epigenetic modifiers, cellular metabolism, actin cytoskeleton and

406 SNARE complex proteins play an important role in the pathology of HD (Figure 8).

407 As noted before, the pathology of HD is neither confined to certain brain regions nor the brain  
408 [4]. A successful HD therapy should, therefore, target a gene or protein that is not exclusively  
409 altered in a certain brain region or tissue. Hence, we analysed RNA data from different brain  
410 regions and blood samples in our meta-analysis, although an increased interstudy variability,  
411 reducing the sensitivity with which differentially expressed genes are identified, may argue  
412 against the combined analysis of different brain regions. Furthermore, certain limitations for  
413 the interpretation and combined analysis of transcriptomic data from different studies should  
414 be considered: although authors of the original publications strictly controlled RNA quality  
415 before RNA sequencing or microarray analysis, small changes in RNA quality might impair  
416 transcript quantification and subsequently also the results of this meta-analysis. Second, post-  
417 mortem samples from HD patients who died from HD can only provide insights into  
418 transcriptional changes at the end stage of HD that do not necessarily reflect changes at disease  
419 onset or during disease progression. Third, neurodegeneration in the brain of HD patients in  
420 late disease stages poses the risk that some of the observed alterations are caused by changes in  
421 tissue composition. Bearing the danger of altered tissue composition as a confounding factor in  
422 mind, we also included the dataset from Agus et al. 2019 who analysed early-stage, prodromal  
423 HD patients in which neuronal loss was less pronounced [13].

424 Several studies have shown that HTT and its interactors such as the huntingtin-associated  
425 protein 1 (HAP1) or the huntingtin-interacting protein 1 (HIP1) participate in protein transport  
426 and the organisation of the cytoskeleton [1]. RNAi-mediated silencing of the huntingtin-  
427 interacting protein 1 related (HIP1R), also known as huntingtin-interacting protein 12 (HIP12),  
428 for instance, led to the stable association of clathrin-coated structures and their endocytic cargo  
429 to dynamin, actin, the Arp2/3 complex, and cortactin [44,45]. Furthermore, HAP1 regulates  
430 synaptic vesicle exocytosis [46] and neuronal endocytosis through its interaction with the Sec23

431 homolog A, COPII coat complex component (SEC23A) and the clathrin light chain B [47]. In  
432 line with previous findings that HTT and its interactors regulate the cytoskeleton and transport  
433 processes and substantiating that impairments of these functions contribute to the  
434 pathophysiology of HD, we identified CDC42 as a hub gene in the M1 subnetwork that was  
435 highly correlated with HD in transcriptomic studies of post-mortem brain samples. CDC42  
436 mRNA levels were also elevated in the brain of HD patients and in the striatum of R6/2 and  
437 YAC128 mice. In contrast to HD, CDC42 mRNA levels were decreased in brain of AD and PD  
438 patients [37]. Besides, mRNA levels of several constituents of the Arp2/Arp3 complex  
439 (ACTR2/Arp2: blood; ACTR3/Arp3: blood and brain; ACTR3B: brain; ARPC5: blood;  
440 ACTR6: brain), that interacts with the HIP1R-cortactin complex and is activated by CDC42,  
441 were altered in HD patients. mRNA levels of VAMP1, an indirect CDC42 interactor, were  
442 robustly upregulated in all studies using HD brain samples (Additional file 1). mRNA levels of  
443 VAMP2 and VAMP7 were additionally altered in the HD blood samples (Additional file 1),  
444 although these alterations were not consistent across the different studies. VAMPs are major  
445 constituents of protein complexes involved in the docking and fusion of vesicles [48]. These  
446 complexes are comprised of VAMPs, other syntaxins, the synaptosome associated protein 25  
447 (SNAP-25), the N-ethylmaleimide-sensitive factor-like protein (NSF), the NSF-attachment  
448 proteins alpha (NAPA, SNAPA), beta (NAPB / SNAPB), gamma (NAPG / SNPAG), and  
449 SNAP receptors (SNARE). Corroborating our finding that the mRNA levels of VAMPs were  
450 altered in the brain and blood of HD patients and the striatum of R6/2 and YAC128 mice (this  
451 study), VAMP2 protein levels were also increased in striatal synaptosomes of Hdh140Q/140Q  
452 mice [49]. On the contrary, protein levels of other proteins involved in the docking and fusion  
453 of vesicles such as SNAP-25 or rabphilin 3a were reduced in the post-mortem cortex of HD  
454 patients [50]. Additionally, analysis of 175Q-HTT knock-in mice demonstrated altered levels  
455 of other proteins involved in synaptic function (SNAP-25, Rab3A, and PSD95), axonal  
456 transport, and microtubules (dynein, dynactin, and KIF3A) [51]. Additionally, HTT can interact

457 with SNAP25, and the SNAP25-associated proteins syntaxin 1A (STX1A) and calcium  
458 voltage-gated channel auxiliary subunit alpha2delta 1 (CACNA2D1) [52]. Raising the  
459 possibility that HTT and its abundant interactor, the huntingtin-associated protein 40 (HAP40),  
460 plays a role in docking and fusion of synaptic vesicles, we previously found that constituents  
461 of this complex, the N-ethylmaleimide-sensitive factor attachment proteins alpha (NAPA,  
462 SNAPA), beta (NAPB / SNAPB), and gamma (NAPG / SNPAG) are the closest homologs of  
463 HAP40 [53].

464 Besides proteins of the SNARE complex, we identified other proteins linked with CDC42 in  
465 our network analysis of transcriptomic data from brain tissue of HD patients. For instance,  
466 PAK1, identified as a hub gene in the subnetwork M1, and its interactor PAK1IP1 showed  
467 robust upregulation in HD patients. The PAK proteins, PAK1 and PAK3, are central regulators  
468 of neuronal development and activating PAK1 mutations were aetiologic for secondary  
469 macrocephaly, developmental delay, ataxic gait and seizures in two unrelated patients [36].  
470 Double knock-out of PAK1/PAK3 in mice affected brain size and structure [54]. Linking PAKs  
471 with HTT, Luo and Rubinszstein showed a physical interaction between HTT and PAK1 [55]  
472 and siRNA-mediated silencing of PAK1 and PAK2 reduced mutant HTT toxicity and  
473 aggregation [55,56]. PAK2 knock-down in the murine striatal cell line STHdh(Q111) also  
474 reduced mutant HTT toxicity [57].

475 As afore-mentioned, we found that 78 % of the genes of the subnetwork MB, which strongly  
476 correlated with HD in the blood (Figure 6), were directly or indirectly regulated by CREB1  
477 (Additional files 6 and 7). CREB1, a leucine zipper transcription factor, activates the  
478 transcription of genes upon binding to the cAMP-response element (CRE). Steffan et al.  
479 previously showed that the CREB1-binding protein (CBP), a transcriptional coactivator of  
480 CREB1, can interact with HTT [22]. In a transcriptomic study of subcutaneous adipose tissue  
481 obtained from HD patients, CREB1 target genes were enriched, and the CREB1 mRNA levels

482 were significantly increased (McCourt et al, 2015). Substantiating the physiological importance  
483 of CREB1, the double knock-out of CREB-1 and the cAMP-responsive element modulator  
484 (CREM) in mice ( $Creb1^{Nescre}Crem^{-/-}$ ) led to severe neuronal loss during brain development and  
485 perinatal death [58]. A conditional, postnatal knock-out of Creb1 and Crem, showed  
486 considerable atrophy in the striatum and hippocampus and a dystonic phenotype [58].  
487 Indicating that the loss-of-function of CREB1 in mice can partly be compensated by CREM,  
488 neither the loss of CREB1 nor CREM alone induced neurodegeneration in mice [58]. While we  
489 also found a strong enrichment of CREB1 target genes in our MB subnetwork by TFEA,  
490 CREB1 mRNA levels appeared to be unaltered in all analysed datasets. As afore-mentioned,  
491 TFEA of the M1 subnetwork consisting of genes with robustly altered mRNA levels in the brain  
492 of HD patients did not highlight CREB1. The finding that CREB1 targets were not enriched in  
493 the M1 subnetwork (Additional file 6) in combination with the data from Mantamadiotis et al.,  
494 raises the possibility that CREB1 function may be affected in the brain of HD patients, but the  
495 CREB1 dysfunction is compensated by CREM or other transcription factors. In contrast,  
496 CREB1 dysfunction might not be compensated outside the brain due to the lack of detectable  
497 CREM protein expression in blood cells [59]. Another transcription factor whose transcription  
498 is controlled by CREB1 and whose target genes were enriched in the MB subnetwork is SP3.  
499 The dual treatment of R6/2 mice with mithramycin, inhibiting SP3, and cystamine reduced the  
500 hypertrimethylation of histone H3 and extended their overall survival over 40% [60]. The  
501 alteration of the activity or mRNA levels of CREB1 might also partly explain observed  
502 alterations in mRNA levels of CDC42 and constituents of the Arp2/3 complex (this meta-  
503 analysis) since CREB can regulate their transcription.

504 The TFEA performed in this study also highlighted the enrichment of NFY target genes in the  
505 M1 and MB subnetwork as well as in the dataset of genes affected in both tissues. In the brain  
506 of HD patients, mRNA levels of NFYB and its target genes were elevated (Figure 5, Additional  
507 file 8). Further corroborating that the dysregulation of NFY and its target genes may be

508 important in HD, van Hagen et al. found an enrichment of NFY target genes among a gene  
509 cluster that was differentially expressed in rat PC12 cells expressing the exon 1 of human 74Q-  
510 HTT [61]. Aggregates of mutant HTT can interact in vitro and in the mouse brain with NFY  
511 and thereby reduce transcription of the NFY target gene HSP70 [62]. On the other hand, our  
512 meta-analysis may indicate that the transcriptional activity and transcription of NFY might be  
513 increased in the brain of HD patients, R6/2 and YAC128 mice. With regards to the currently  
514 available data on the role of NFY in HD, we cannot exclude the possibility that elevated mRNA  
515 levels of NFY and its target genes are caused by a compensatory mechanism to restore NFY  
516 function. This scenario may explain why transcription of NFY targets was reduced in one study  
517 [62], while we observed increased transcription of NFY and its targets.

518 Besides NFY and CREB-1, TFEA (Additional file 6) of the M1 subnetwork of genes altered in  
519 the brain of HD patients highlighted DLX1, PRMT3, and HMGN3 that may be involved in  
520 astrocyte maturation [63]. To our knowledge, this is the first study which indicates a potential  
521 role of DLX1, PRMT3, and HMGN3 dysfunction in HD. As noted above, DLX1 mRNA levels  
522 were only upregulated in the brain of HD patients in two studies, while it appeared to be  
523 unaffected in the third study analysing the caudate nucleus of prodromal HD patients.  
524 Additionally, DLX-1 mRNA levels were elevated in the striatum of R6/2 mice, while it was  
525 unaltered in the striatum of YAC128 mice. Besides the role of DLX1 in the adult brain, DLX1  
526 plays also an important role in brain development; DLX1, together with NOLZ-1 and DLX2,  
527 regulates the migration of striatal neurones to the dorsal or ventral striatum and the identity of  
528 striatal projection neurones [64]. Chen et al. also demonstrated that the knock-out of NOLZ-1,  
529 also known as zinc finger protein 503 (ZNF503), in mice led to an upregulation of DLX1/2 and  
530 an aberrant neuronal migration from the dorsal to the ventral striatum [64]. Demonstrating that  
531 elevated DLX1/DLX2 levels were causative for the aberrant neuronal migration, restoration of  
532 the altered DLX1/DLX2 levels in NOLZ-1 knock-out mice rescued the aberrant neuronal  
533 migration [64]. A conditional DLX1 knock-out in cortical interneurons in mice reduced the

534 excitatory input, fewer excitatory synapses and hypoplastic dendrites [65] which substantiated  
535 on the relevance of DLX1 beyond the striatum. Additionally, DLX1 knock-down in  
536 interneurons enhanced dendritic growth through neuropilin-2 and PAK3 [66], that was also  
537 slightly upregulated in the brain of HD patients (Z-ratios: 1.98; 0.46; 0.70) according to this  
538 meta-analysis. PRMT3, a protein methyltransferase whose mRNA levels were elevated in the  
539 brain of HD patients and the striatum of R6/2 mice (this study) but neither in the blood nor the  
540 striatum of YAC128 mice, is essential for dendritic spine maturation in the rat hippocampus  
541 [67] and neuronal development [68]. Due to a more rapid disease progression and disease onset  
542 in R6/2 than YAC128 mice [69,70], the elevation of DLX-1 and PRMT3 mRNA levels in the  
543 striatum of R6/2 but not in YAC128 mice raises the possibility that the dysregulation of DLX-  
544 1 and PRMT3 occurs in later disease stages and is more pronounced upon expression of the  
545 HTT-exon1 fragment.

## 546 **Conclusion**

547 Here, we identified, by RRA and WGCNA, subnetworks of 320 (M1) and 118 (MB) genes with  
548 robustly altered mRNA levels in the brain and blood of HD patients, resp. In the brain, CDC42,  
549 PAK1, YWHAH, and PP2CA were highlighted as hub genes of the M1 subnetwork (Additional  
550 file 4), that appears to be enriched in genes functioning in protein transport (Figure 3). We also  
551 identified a signature of 74 and 41 genes, including CDC42 and YWHAH, that were altered in  
552 the brain of PD and HD (Figure 5 and Additional file 7) and AD, PD and HD patients,  
553 respectively. In blood, we identified a subnetwork of 118 genes, including genes coding for  
554 several constituents of the Arp2/3 complex that is activated by CDC42. TFEA (Figure 5 and  
555 Additional file 6) highlighted the relevance of CREB1 in the pathology of HD since the  
556 transcription of 78.0 % of genes altered in the blood of HD patients were directly or indirectly  
557 regulated by CREB1. Furthermore, DLX1, PRMT3, HMGN3 and NFY target genes were  
558 enriched in the identified modules. HMGN3, NFYA, NFYB, and CDC42 mRNA levels were

559 additionally altered in R6/2 and YAC128 mice (Additional file 9) and could be used to  
560 discriminate between control and HD mice (Additional files 10 and 11). Indicating that the  
561 upregulation of DLX1 and PRMT3 transcription may occur in later disease stages, DLX-1 and  
562 PRMT3 mRNA levels were merely elevated in R6/2 mice but not in YAC128 mice that show  
563 a less severe HD phenotype than R6/2 mice.

564 Our results strongly suggest that abnormal protein transport, cytoskeletal organization, and  
565 transcriptional regulation might be central features in the pathophysiology of HD (figure 8).  
566 Furthermore, our study substantiates the role of CDC42, previously identified HTT interactors  
567 (e.g. PAK1, and PAK2) and transcriptional regulators (e.g. CREB1 and NFY) which have been  
568 reported to be sequestered to mutant HTT aggregates. Most interestingly, our data indicate a  
569 potential pathophysiological role of DLX-1, HMGN3 and PRMT3 in HD that have not been  
570 reported before.

## 571 **Methods**

### 572 **Retrieval and tidning of datasets**

573 In our meta-analysis, we analysed transcriptomic studies that were published in a peer-reviewed  
574 journal and whose raw data were publicly available. Furthermore, we excluded transcriptomic  
575 studies with less than eight samples from HD patients. To analyse post-mortem brain tissue, we  
576 retrieved data from the Gene Ontology Omnibus (GEO) database of the National Center for  
577 Biotechnology Information (NCBI) with the accession number GSE33000 [16], GSE129473  
578 [13], and GSE64810 [14]. For the analysis of blood samples from HD patients, raw data were  
579 retrieved from the GEO database with the accession numbers GSE1751 [19], GSE24250 [17],  
580 and GSE8762 [18]. If genes were measured by several probes, the average of all probes of the  
581 respective genes was used. In our meta-analysis, we excluded samples from presymptomatic  
582 HD patients due to a low patient number.



583 Missing data in the dataset GSE33000 were imputed by sequential and random hot-deck  
584 imputation as implement in the R-package VIM [71] since we assumed missing at random after  
585 graphical analysis of missing values by the R-function matrixplot (VIM package) [72]. We  
586 normalised raw transcript-levels by quantile-normalisation using the R function  
587 `normalize.quantiles.robust` from the package `preprocessCore` (Bolstad, 2019) and, afterwards,  
588 converted them into Z-Scores.

### 589 **Robust rank aggregation analysis (RRA)**

590 To obtain a list of robustly altered genes, we computed Z-ratios according to the method  
591 proposed by Cheadle et al., 2003 [73] and ranked them after their absolute Z-ratio. The sorted  
592 transcript lists were analysed with RRA, as implemented in the R package `RobustRankAggreg`  
593 [74]. RRA is a distribution-based and parameter-free method that detects genes ranked  
594 consistently better than expected for uncorrelated genes (null hypothesis) and computes an  
595 significance score based on an probabilistic model [74]. The used the RRA algorithm previously  
596 showed a higher robustness to outliers, noise, and errors than other rank aggregation methods  
597 [74].

598 We included transcripts with a RRA score  $< 0.05$  in the further downstream analysis and  
599 performed clustering analysis and plotting of the heatmaps with the function `heatmap.2`  
600 implemented in the R-package `gplots` (version 3.0.3) [75].

### 601 **Generation of weighted correlation networks**

602 For the weighted correlation network analysis (WGCNA), the signed co-expression networks  
603 were build using the R-package `WGCNA` [76]. Correlation between genes was computed by  
604 biweight midcorrelation [76] to compute adjacency matrices. Based on the scale-free criterion  
605 [77], we set the power parameter  $\beta$  and computed the topological overlap measure (TOM) and  
606 the corresponding dissimilarity matrices ( $1 - \text{TOM}$ ). Genes were clustered by model-based  
607 clustering of the dissimilarity matrix as implemented by Scrucca et al. 2016 [78]. Correlation

608 of module eigengenes with disease state and between gene significance and module  
609 membership were calculated by Pearson's product-moment correlation as implemented in R  
610 (Langfelder et al, 2008; R Core Team, 2020). We adjusted p-values for multiple testing with  
611 the method described by Yekutieli & Benjamini, 2001 [79]. Genes with a gene significance  
612 score above 0.3, module membership above 0.7, and intramodular connectivity that is larger  
613 than the 8th percentile of all genes were identified as hubs.

#### 614 **Enrichment Analysis**

615 Gene set enrichment analysis (GSEA) was conducted with the algorithm implemented in the  
616 STRING database [28] for each dataset separately and results were combined by ranking  
617 enriched terms after their enrichment scores and aggregation by RRA [74]. Gene ontology (GO)  
618 and Reactome term enrichment of genes from different subnetworks were performed with the  
619 algorithms implemented by the STRING database [28] in Cytoscape (version 3.7.2) [80].

620 Based on the pathway annotations in the KEGG database [81] and the protein-protein  
621 interaction data from STRING (version 11.0) [28], we performed a network enrichment  
622 analysis test (NEAT) [82] as implemented in the R package 'neat'. Transcription factor  
623 enrichment analysis (TFEA) was performed with CHIP-X Enrichment Analysis 3 (CheA3) [83]  
624 using the mean rank as the metric. Furthermore, we calculated the mean Z-ratios of transcription  
625 factor targets with R-scripting language [84] and plotted the results using ggplot2 [85].

#### 626 **Network analysis**

627 Protein-protein interaction networks (PPIN) were retrieved from the STRING database [28]  
628 using a confidence level cut-off of 0.4 and the Cytoscape software (version 3.7.2) [80]. Top 50  
629 hubs of the PPIN were computed with the cytoHubba plug-in [86] using the betweenness,  
630 bottleneck, closeness, clustering coefficient, degree, DMNC, EcCentricity, EPC, MCC,  
631 radiality and stress scoring methods. Results of different scoring methods were aggregated by  
632 RRA [74] to increase the robustness of the prediction. For the network of genes altered in HD,

633 AD, and PD only the top 10 (protein-protein-interaction network) hub proteins or top 20  
634 (coexpression network) were used. We included hub proteins with an RRA score below 0.05 in  
635 the further analysis and combined the lists of hubs in the co-expression network, identified by  
636 WGNA, and the protein-protein interaction network by RRA [74].

### 637 **Comparison of differentially expressed genes in the brain of AD, PD, and HD patients**

638 The list of differentially expressed genes in the brain of AD and PD patients was retrieved from  
639 Kelly et al 2019 [37] and for HD all genes with an RRA score in the brain below 0.05 were used.  
640 Networks and hub proteins / genes were computed as described above.

### 641 **Confirmation of hub genes in HD mouse models**

642 We analysed two datasets with transcriptomic data of HD mouse models to confirm if the  
643 identified hub genes and transcriptional regulators were additionally altered in independent  
644 datasets. In these studies, transcriptomic alterations in the striatum of R6/2 [42] (NCBI  
645 accession number: GSE113929) or YAC128 (NCBI accession number: GSE19677) [43] were  
646 analysed. Since Becanovic et al. 2010 used YAC128 mice at the age of 12 and 24 months, we  
647 separated the samples according to the age of mice and analysed them as independent datasets.  
648 Data tidying and computation of Z-ratios were performed as described in the sections “retrieval  
649 and tiding of datasets” and “Robust rank aggregation analysis (RRA)”.

650 Classification analysis of selected genes (ACTR2, ACTR3, ARPC5, CDC42, CREB1, DLX1,  
651 DNMT1, DNMT3A, DNMT3B, HDAC2, HDAC5, HMG3, NFYA, NFYB, NFYC, PAK1,  
652 PRMT3, VAMP2, VAMP7, YWHAH, ZDHHC13, ZDHHC17), identified in the human  
653 datasets, was performed, as implemented in the R-package pROC [87], to compute the area  
654 under the curve (AUC) of the respective receiver-operator characteristics (ROC). 95 %  
655 confidence intervals of AUCs were calculated by bootstrapping with 10,000 replicates and  
656 genes with confidence intervals for the AUC above 0.5 were considered capable to discriminate  
657 between control and HD mice since the classification model is statistically significantly better

658 than a random classification model.

## 659 **Acknowledgements**

660 We acknowledge funding of this work by the Deutsche Forschungsgemeinschaft (DFG,  
661 German Research Foundation – project number 412854449). We thank Andreas Neueder for  
662 discussions on the results of this meta-analysis. Furthermore, we thank Robin Nilson for  
663 improving the design of figure 9.

## 664 **Author contributions**

665 MS planned and performed bioinformatical analyses of transcriptomic data. MS and SK wrote  
666 and revised the manuscript.

## 667 **Data Availability**

668 All used transcriptomic data are accessible from the Gene Ontology Omnibus (GEO) database  
669 of the National Center for Biotechnology Information (NCBI) with the accession numbers  
670 given in the methods section. R scripts used for the analysis are made available upon reasonable  
671 request to the corresponding author.

## 672 **Conflict of interest**

673 The authors declare that they have no competing interests.

## 674 **References**

- 675 1. Saudou F, Humbert S (2016) The Biology of Huntingtin. *Neuron* 89 (5): 910–926.
- 676 2. The Huntington’s Disease Collaborative Research Group (1993) A novel gene containing a  
677 trinucleotide repeat that is expanded and unstable on Huntington’s disease chromosomes.  
678 *Cell* 72 (6): 971–983.
- 679 3. Ross CA, Tabrizi SJ (2011) Huntington’s disease: from molecular pathogenesis to clinical

- 680 treatment. *The Lancet Neurology* 10 (1): 83–98.
- 681 4. van der Burg JMM, Björkqvist M, Brundin P (2009) Beyond the brain: widespread pathology  
682 in Huntington’s disease. *The Lancet Neurology* 8 (8): 765–774.
- 683 5. Zuccato C, Cattaneo E (2014) Normal function of huntingtin. In: Bates G, Tabrizi S, Jones  
684 L, editors. *Huntington’s disease*. Oxford, New York: Oxford University Press. pp. 243–273.
- 685 6. Shirasaki DI, Greiner ER, Al-Ramahi I, Gray M, Boontheung P et al. (2012) Network  
686 organization of the huntingtin proteomic interactome in mammalian brain. *Neuron* 75 (1):  
687 41–57.
- 688 7. Crotti A, Glass CK (2015) The choreography of neuroinflammation in Huntington’s disease.  
689 *Trends in immunology* 36 (6): 364–373.
- 690 8. Tabrizi SJ, Cleeter MW, Xuereb J, Taanman JW, Cooper JM et al. (1999) Biochemical  
691 abnormalities and excitotoxicity in Huntington’s disease brain. *Annals of neurology* 45 (1):  
692 25–32.
- 693 9. Fan MMY, Raymond LA (2007) N-methyl-D-aspartate (NMDA) receptor function and  
694 excitotoxicity in Huntington’s disease. *Progress in neurobiology* 81 (5-6): 272–293.
- 695 10. Gipson TA, Neueder A, Wexler NS, Bates GP, Housman D (2013) Aberrantly spliced HTT,  
696 a new player in Huntington’s disease pathogenesis. *RNA biology* 10 (11): 1647–1652.
- 697 11. Harjes P, Wanker EE (2003) The hunt for huntingtin function: interaction partners tell  
698 many different stories. *Trends in Biochemical Sciences* 28 (8): 425–433.
- 699 12. Velier J, Kim M, Schwarz C, Kim TW, Sapp E et al. (1998) Wild-type and mutant  
700 huntingtins function in vesicle trafficking in the secretory and endocytic pathways.  
701 *Experimental neurology* 152 (1): 34–40.
- 702 13. Agus F, Crespo D, Myers RH, Labadorf A (2019) The caudate nucleus undergoes dramatic  
703 and unique transcriptional changes in human prodromal Huntington’s disease brain. *BMC*  
704 *medical genomics* 12 (1): 137.
- 705 14. Labadorf A, Hoss AG, Lagomarsino V, Latourelle JC, Hadzi TC et al. (2015) RNA  
706 Sequence Analysis of Human Huntington Disease Brain Reveals an Extensive Increase in  
707 Inflammatory and Developmental Gene Expression. *PloS one* 10 (12): e0143563.
- 708 15. Labadorf A, Choi SH, Myers RH (2017) Evidence for a Pan-Neurodegenerative Disease  
709 Response in Huntington’s and Parkinson’s Disease Expression Profiles. *Frontiers in*

- 710           molecular neuroscience 10: 430.
- 711   16. Narayanan M, Huynh JL, Wang K, Yang X, Yoo S et al. (2014) Common dysregulation  
712       network in the human prefrontal cortex underlies two neurodegenerative diseases. *Molecular*  
713       *systems biology* 10: 743.
- 714   17. Hu Y, Chopra V, Chopra R, Locascio JJ, Liao Z et al. (2011) Transcriptional modulator  
715       H2A histone family, member Y (H2AFY) marks Huntington disease activity in man and  
716       mouse. *Proceedings of the National Academy of Sciences of the United States of America*  
717       108 (41): 17141–17146.
- 718   18. Runne H, Kuhn A, Wild EJ, Pratyaksha W, Kristiansen M et al. (2007) Analysis of potential  
719       transcriptomic biomarkers for Huntington’s disease in peripheral blood. *Proceedings of the*  
720       *National Academy of Sciences of the United States of America* 104 (36): 14424–14429.
- 721   19. Borovecki F, Lovrecic L, Zhou J, Jeong H, Then F et al. (2005) Genome-wide expression  
722       profiling of human blood reveals biomarkers for Huntington’s disease. *Proceedings of the*  
723       *National Academy of Sciences of the United States of America* 102 (31): 11023–11028.
- 724   20. Neueder A, Bates GP (2014) A common gene expression signature in Huntington’s disease  
725       patient brain regions. *BMC medical genomics*: 60.
- 726   21. Le Gras S, Keime C, Anthony A, Lotz C, Longprez L de et al. (2017) Altered enhancer  
727       transcription underlies Huntington’s disease striatal transcriptional signature. *Scientific*  
728       *reports* 7: 42875.
- 729   22. Steffan JS, Kazantsev A, Spasic-Boskovic O, Greenwald M, Zhu YZ et al. (2000) The  
730       Huntington’s disease protein interacts with p53 and CREB-binding protein and represses  
731       transcription. *Proceedings of the National Academy of Sciences of the United States of*  
732       *America* 97 (12): 6763–6768.
- 733   23. McCampbell A, Taylor JP, Taye AA, Robitschek J, Li M et al. (2000) CREB-binding protein  
734       sequestration by expanded polyglutamine. *Human molecular genetics* 9 (14): 2197–2202.
- 735   24. Cha JH (2000) Transcriptional dysregulation in Huntington’s disease. *Trends in*  
736       *neurosciences* 23 (9): 387–392.
- 737   25. Sugars KL, Rubinsztein DC (2003) Transcriptional abnormalities in Huntington disease.  
738       *Trends in genetics : TIG* 19 (5): 233–238.
- 739   26. Martí E (2016) RNA toxicity induced by expanded CAG repeats in Huntington’s disease.  
740       *Brain pathology (Zurich, Switzerland)* 26 (6): 779–786.

- 741 27. Nalavade R, Griesche N, Ryan DP, Hildebrand S, Krauss S (2013) Mechanisms of RNA-  
742 induced toxicity in CAG repeat disorders. *Cell death & disease* 4: e752.
- 743 28. Szklarczyk D, Gable AL, Lyon D, Junge A, Wyder S et al. (2019) STRING v11: protein-  
744 protein association networks with increased coverage, supporting functional discovery in  
745 genome-wide experimental datasets. *Nucleic acids research* 47 (D1): D607-D613.
- 746 29. Modzelewska K, Newman LP, Desai R, Keely PJ (2006) Ack1 mediates Cdc42-dependent  
747 cell migration and signaling to p130Cas. *The Journal of biological chemistry* 281 (49):  
748 37527–37535.
- 749 30. Ocegüera-Yanez F, Kimura K, Yasuda S, Higashida C, Kitamura T et al. (2005) Ect2 and  
750 MgcRacGAP regulate the activation and function of Cdc42 in mitosis. *The Journal of cell*  
751 *biology* 168 (2): 221–232.
- 752 31. Gauthier-Campbell C, Bredt DS, Murphy TH, El-Husseini AE-D (2004) Regulation of  
753 dendritic branching and filopodia formation in hippocampal neurons by specific acylated  
754 protein motifs. *Molecular biology of the cell* 15 (5): 2205–2217.
- 755 32. Manser E, Leung T, Salihuddin H, Zhao ZS, Lim L (1994) A brain serine/threonine protein  
756 kinase activated by Cdc42 and Rac1. *Nature* 367 (6458): 40–46.
- 757 33. Hsu C-C, Leu Y-W, Tseng M-J, Lee K-D, Kuo T-Y et al. (2011) Functional characterization  
758 of Trip10 in cancer cell growth and survival. *Journal of biomedical science* 18: 12.
- 759 34. Holbert S, Dedeoglu A, Humbert S, Saudou F, Ferrante RJ et al. (2003) Cdc42-interacting  
760 protein 4 binds to huntingtin: neuropathologic and biological evidence for a role in  
761 Huntington’s disease. *Proceedings of the National Academy of Sciences of the United States*  
762 *of America* 100 (5): 2712–2717.
- 763 35. Lu R, Wilson JM (2016) Rab14 specifies the apical membrane through Arf6-mediated  
764 regulation of lipid domains and Cdc42. *Scientific reports* 6: 38249.
- 765 36. Harms FL, Kloth K, Bley A, Denecke J, Santer R et al. (2018) Activating Mutations in  
766 PAK1, Encoding p21-Activated Kinase 1, Cause a Neurodevelopmental Disorder. *American*  
767 *journal of human genetics* 103 (4): 579–591.
- 768 37. Kelly J, Moyeed R, Carroll C, Albani D, Li X (2019) Gene expression meta-analysis of  
769 Parkinson’s disease and its relationship with Alzheimer’s disease. *Molecular brain* 12 (1): 16.
- 770 38. Worby CA, Dixon JE (2002) Sorting out the cellular functions of sorting nexins. *Nature*  
771 *reviews. Molecular cell biology* 3 (12): 919–931.

- 772 39. Molinie N, Gautreau A (2018) The Arp2/3 Regulatory System and Its Deregulation in  
773 Cancer. *Physiological reviews* 98 (1): 215–238.
- 774 40. Watson JR, Owen D, Mott HR (2017) Cdc42 in actin dynamics: An ordered pathway  
775 governed by complex equilibria and directional effector handover. *Small GTPases* 8 (4):  
776 237–244.
- 777 41. Kang R, Wang L, Sanders SS, Zuo K, Hayden MR et al. (2019) Altered Regulation of Striatal  
778 Neuronal N-Methyl-D-Aspartate Receptor Trafficking by Palmitoylation in Huntington  
779 Disease Mouse Model. *Frontiers in synaptic neuroscience* 11: 3.
- 780 42. Miyazaki H, Yamanaka T, Oyama F, Kino Y, Kurosawa M et al. (2020) FACS-array-based  
781 cell purification yields a specific transcriptome of striatal medium spiny neurons in a murine  
782 Huntington disease model. *The Journal of biological chemistry* 295 (29): 9768–9785.
- 783 43. Becanovic K, Pouladi MA, Lim RS, Kuhn A, Pavlidis P et al. (2010) Transcriptional changes  
784 in Huntington disease identified using genome-wide expression profiling and cross-platform  
785 analysis. *Human molecular genetics* 19 (8): 1438–1452.
- 786 44. Engqvist-Goldstein AEY, Zhang CX, Carreno S, Barroso C, Heuser JE et al. (2004) RNAi-  
787 mediated Hip1R silencing results in stable association between the endocytic machinery and  
788 the actin assembly machinery. *Molecular biology of the cell* 15 (4): 1666–1679.
- 789 45. Le Clainche C, Pauly BS, Zhang CX, Engqvist-Goldstein AEY, Cunningham K et al. (2007)  
790 A Hip1R-cortactin complex negatively regulates actin assembly associated with endocytosis.  
791 *The EMBO journal* 26 (5): 1199–1210.
- 792 46. Mackenzie KD, Lumsden AL, Guo F, Duffield MD, Chataway T et al. (2016) Huntingtin-  
793 associated protein-1 is a synapsin I-binding protein regulating synaptic vesicle exocytosis and  
794 synapsin I trafficking. *Journal of neurochemistry* 138 (5): 710–721.
- 795 47. Mackenzie KD, Lim Y, Duffield MD, Chataway T, Zhou X-F et al. (2017) Huntingtin-  
796 associated protein-1 (HAP1) regulates endocytosis and interacts with multiple trafficking-  
797 related proteins. *Cellular signalling* 35: 176–187.
- 798 48. Jena BP (2011) Role of SNAREs in membrane fusion. *Advances in experimental medicine*  
799 *and biology* 713: 13–32.
- 800 49. Valencia A, Sapp E, Kimm JS, McClory H, Ansong KA et al. (2013) Striatal synaptosomes  
801 from Hdh140Q/140Q knock-in mice have altered protein levels, novel sites of methionine  
802 oxidation, and excess glutamate release after stimulation. *Journal of Huntington's disease* 2



- 803 (4): 459–475.
- 804 50. Smith R, Klein P, Koc-Schmitz Y, Waldvogel HJ, Faull RLM et al. (2007) Loss of SNAP-25  
805 and rabphilin 3a in sensory-motor cortex in Huntington’s disease. *Journal of neurochemistry*  
806 103 (1): 115–123.
- 807 51. Smith GA, Rocha EM, McLean JR, Hayes MA, Izen SC et al. (2014) Progressive axonal  
808 transport and synaptic protein changes correlate with behavioral and neuropathological  
809 abnormalities in the heterozygous Q175 KI mouse model of Huntington’s disease. *Human*  
810 *molecular genetics* 23 (17): 4510–4527.
- 811 52. Kaltenbach LS, Romero E, Becklin RR, Chettier R, Bell R et al. (2007) Huntingtin  
812 interacting proteins are genetic modifiers of neurodegeneration. *PLoS genetics* 3 (5): e82.
- 813 53. Seefelder M, Alva V, Huang B, Engler T, Baumeister W et al. (2020) The evolution of the  
814 huntingtin-associated protein 40 (HAP40) in conjunction with huntingtin. *BMC*  
815 *Evolutionary Biology* 20 (162).
- 816 54. Huang W, Zhou Z, Asrar S, Henkelman M, Xie W et al. (2011) p21-Activated kinases 1 and  
817 3 control brain size through coordinating neuronal complexity and synaptic properties.  
818 *Molecular and cellular biology* 31 (3): 388–403.
- 819 55. Luo S, Rubinsztein DC (2009) Huntingtin promotes cell survival by preventing Pak2  
820 cleavage. *Journal of cell science* 122 (Pt 6): 875–885.
- 821 56. Luo S, Mizuta H, Rubinsztein DC (2008) p21-activated kinase 1 promotes soluble mutant  
822 huntingtin self-interaction and enhances toxicity. *Human molecular genetics* 17 (6): 895–  
823 905.
- 824 57. Tourette C, Li B, Bell R, O’Hare S, Kaltenbach LS et al. (2014) A large scale Huntingtin  
825 protein interaction network implicates Rho GTPase signaling pathways in Huntington  
826 disease. *The Journal of biological chemistry* 289 (10): 6709–6726.
- 827 58. Mantamadiotis T, Lemberger T, Bleckmann SC, Kern H, Kretz O et al. (2002) Disruption of  
828 CREB function in brain leads to neurodegeneration. *Nature genetics* 31 (1): 47–54.
- 829 59. Uhlén M, Fagerberg L, Hallström BM, Lindskog C, Oksvold P et al. (2015) Proteomics.  
830 Tissue-based map of the human proteome. *Science (New York, N.Y.)* 347 (6220): 1260419.
- 831 60. Ryu H, Lee J, Hagerty SW, Soh BY, McAlpin SE et al. (2006) ESET/SETDB1 gene  
832 expression and histone H3 (K9) trimethylation in Huntington’s disease. *Proceedings of the*  
833 *National Academy of Sciences of the United States of America* 103 (50): 19176–19181.

- 834 61. van Hagen M, Piebes DGE, Leeuw WC de, Vuist IM, van Roon-Mom WMC et al. (2017)  
835 The dynamics of early-state transcriptional changes and aggregate formation in a  
836 Huntington's disease cell model. *BMC genomics* 18 (1): 373.
- 837 62. Yamanaka T, Miyazaki H, Oyama F, Kurosawa M, Washizu C et al. (2008) Mutant  
838 Huntingtin reduces HSP70 expression through the sequestration of NF-Y transcription  
839 factor. *The EMBO journal* 27 (6): 827–839.
- 840 63. Lee SS, Seo HS, Choi SJ, Park HS, Lee JY et al. (2003) Characterization of the two genes  
841 differentially expressed during development in human fetal astrocytes. *Yonsei medical*  
842 *journal* 44 (6): 1059–1068.
- 843 64. Chen S-Y, Lu K-M, Ko H-A, Huang T-H, Hao JH-J et al. (2020) Parcellation of the striatal  
844 complex into dorsal and ventral districts. *Proceedings of the National Academy of Sciences*  
845 *of the United States of America* 117 (13): 7418–7429.
- 846 65. Pla R, Stanco A, Howard MA, Rubin AN, Vogt D et al. (2018) Dlx1 and Dlx2 Promote  
847 Interneuron GABA Synthesis, Synaptogenesis, and Dendritogenesis. *Cerebral cortex (New*  
848 *York, N.Y. : 1991)* 28 (11): 3797–3815.
- 849 66. Dai X, Iwasaki H, Watanabe M, Okabe S (2014) Dlx1 transcription factor regulates dendritic  
850 growth and postsynaptic differentiation through inhibition of neuropilin-2 and PAK3  
851 expression. *The European journal of neuroscience* 39 (4): 531–547.
- 852 67. Miyata S, Mori Y, Tohyama M (2010) PRMT3 is essential for dendritic spine maturation in  
853 rat hippocampal neurons. *Brain research* 1352: 11–20.
- 854 68. Ikenaka K, Miyata S, Mori Y, Koyama Y, Taneda T et al. (2006) Immunohistochemical and  
855 western analyses of protein arginine N-methyltransferase 3 in the mouse brain.  
856 *Neuroscience* 141 (4): 1971–1982.
- 857 69. Menalled L, El-Khodori BF, Patry M, Suárez-Fariñas M, Orenstein SJ et al. (2009) Systematic  
858 behavioral evaluation of Huntington's disease transgenic and knock-in mouse models.  
859 *Neurobiology of disease* 35 (3): 319–336.
- 860 70. Farshim PP, Bates GP (2018) Mouse Models of Huntington's Disease. *Methods in*  
861 *molecular biology (Clifton, N.J.)* 1780: 97–120.
- 862 71. Kowarik A, Templ M (2016) Imputation with the R Package VIM. *J. Stat. Soft.* 74 (7).
- 863 72. Templ M, Alfons A, Filzmoser P (2012) Exploring incomplete data using visualization  
864 techniques. *Adv Data Anal Classif* 6 (1): 29–47.

- 865 73. Cheadle C, Vawter MP, Freed WJ, Becker KG (2003) Analysis of Microarray Data Using Z  
866 Score Transformation. *The Journal of Molecular Diagnostics* 5 (2): 73–81.
- 867 74. Kolde R, Laur S, Adler P, Vilo J (2012) Robust rank aggregation for gene list integration and  
868 meta-analysis. *Bioinformatics (Oxford, England)* 28 (4): 573–580.
- 869 75. Warnes GR, Bolker B, Bonebakker L, Gentleman R, Huber W et al. (2020) gplots: Various  
870 R Programming Tools for Plotting Data.
- 871 76. Langfelder P, Horvath S (2008) WGCNA: an R package for weighted correlation network  
872 analysis. *BMC bioinformatics* 9: 559.
- 873 77. Zhang B, Horvath S (2005) A general framework for weighted gene co-expression network  
874 analysis. *Statistical applications in genetics and molecular biology* 4: Article17.
- 875 78. Scrucca L, Fop M, Murphy TB, Raftery A (2016) mclust 5: Clustering, Classification and  
876 Density Estimation Using Gaussian Finite Mixture Models. *The R Journal* 8 (1): 289.
- 877 79. Yekutieli D, Benjamini Y (2001) The control of the false discovery rate in multiple testing  
878 under dependency. *Ann. Statist.* 29 (4): 1165–1188.
- 879 80. Shannon P, Markiel A, Ozier O, Baliga NS, Wang JT et al. (2003) Cytoscape: a software  
880 environment for integrated models of biomolecular interaction networks. *Genome research*  
881 13 (11): 2498–2504.
- 882 81. Kanehisa M, Goto S (2000) KEGG: kyoto encyclopedia of genes and genomes. *Nucleic  
883 acids research* 28 (1): 27–30.
- 884 82. Signorelli M, Vinciotti V, Wit EC (2016) NEAT: an efficient network enrichment analysis  
885 test. *BMC bioinformatics* 17 (1): 352.
- 886 83. Keenan AB, Torre D, Lachmann A, Leong AK, Wojciechowicz ML et al. (2019) ChEA3:  
887 transcription factor enrichment analysis by orthogonal omics integration. *Nucleic acids  
888 research* 47 (W1): W212–W224.
- 889 84. R Core Team (2020) R: A Language and Environment for Statistical Computing. Vienna,  
890 Austria.
- 891 85. Wickham H (2016) ggplot2. *Elegant graphics for data analysis*. Cham: Springer. 140 p.
- 892 86. Chin C-H, Chen S-H, Wu H-H, Ho C-W, Ko M-T et al. (2014) cytoHubba: identifying hub  
893 objects and sub-networks from complex interactome. *BMC systems biology* 8 Suppl 4: S11.
- 894 87. Robin X, Turck N, Hainard A, Tiberti N, Lisacek F et al. (2011) pROC: an open-source

- 895 package for R and S+ to analyze and compare ROC curves. BMC bioinformatics 12: 77.
- 896 88. Warde-Farley D, Donaldson SL, Comes O, Zuberi K, Badrawi R et al. (2010) The  
897 GeneMANIA prediction server: biological network integration for gene prioritization and  
898 predicting gene function. Nucleic acids research 38 (Web Server issue): W214-20.
- 899

900 **Figures**

901

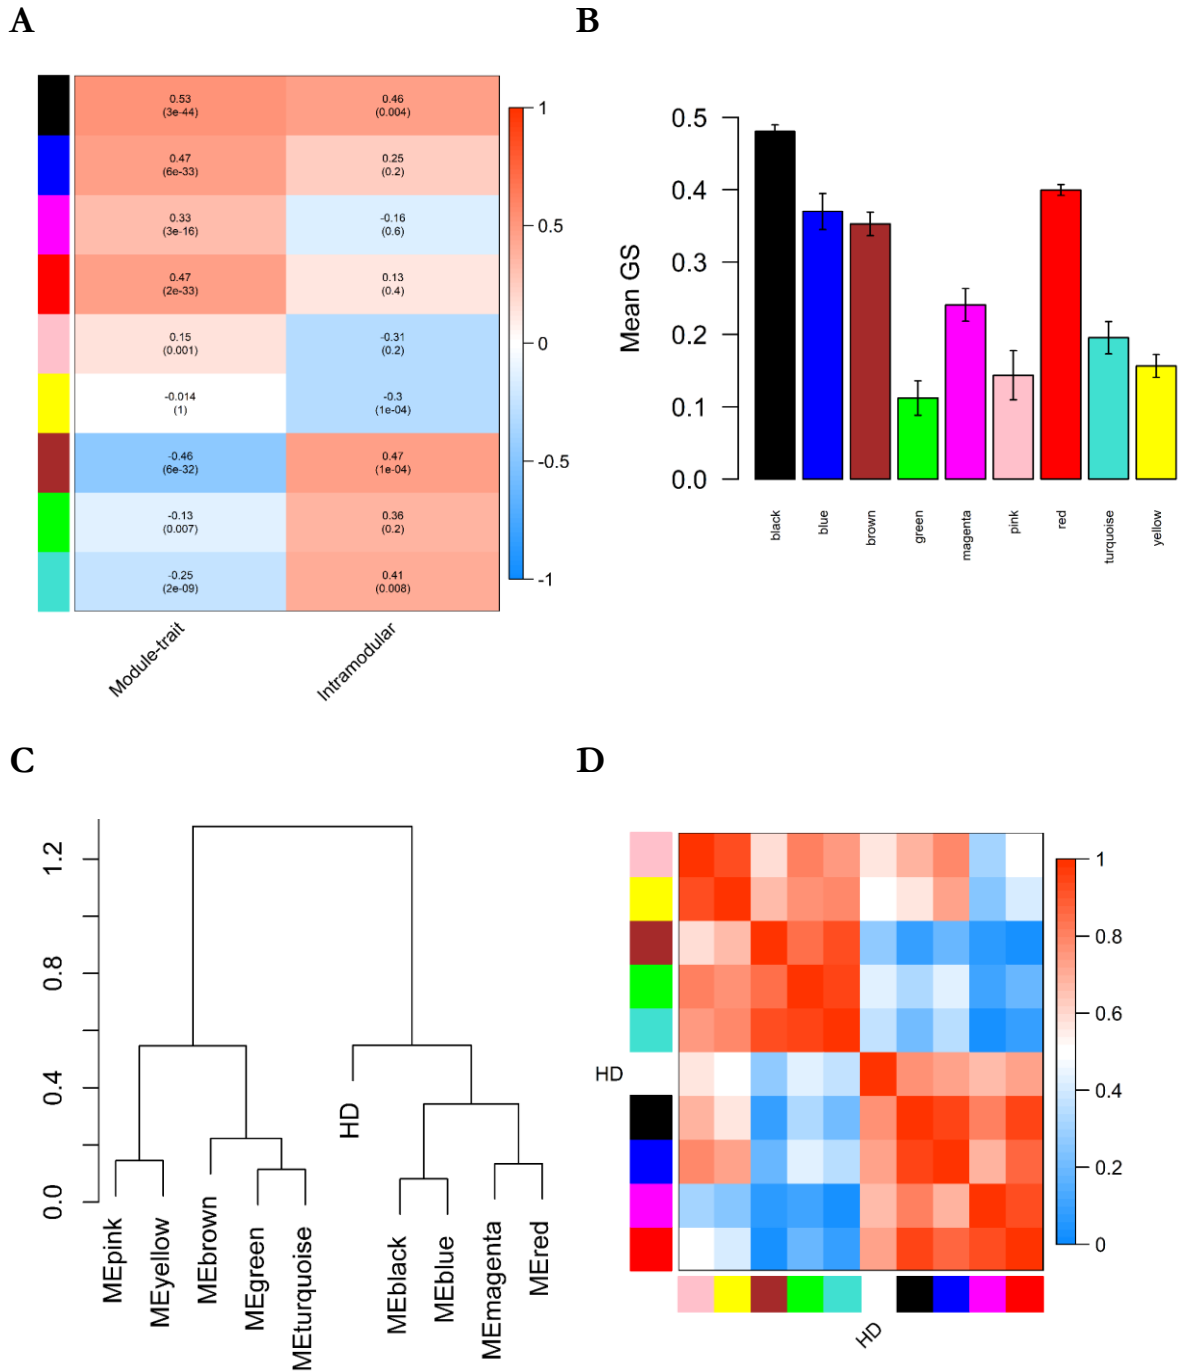

902

903 **Figure 1: Result of WGCNA analysis and the association of the disease state with module eigengenes.**  
 904 A. Heatmap showing the correlation between module and disease state or between gene significance and  
 905 module membership. P-values adjusted after Benjamini & Yekutieli (Yekutieli & Benjamini, 2001) are  
 906 given in brackets. B: Mean gene significance of each module. Error bars depict the 95% confidence interval.  
 907 C. Dendrogram showing hierarchical clustering of module eigengenes. D. Eigengene adjacency heatmap.

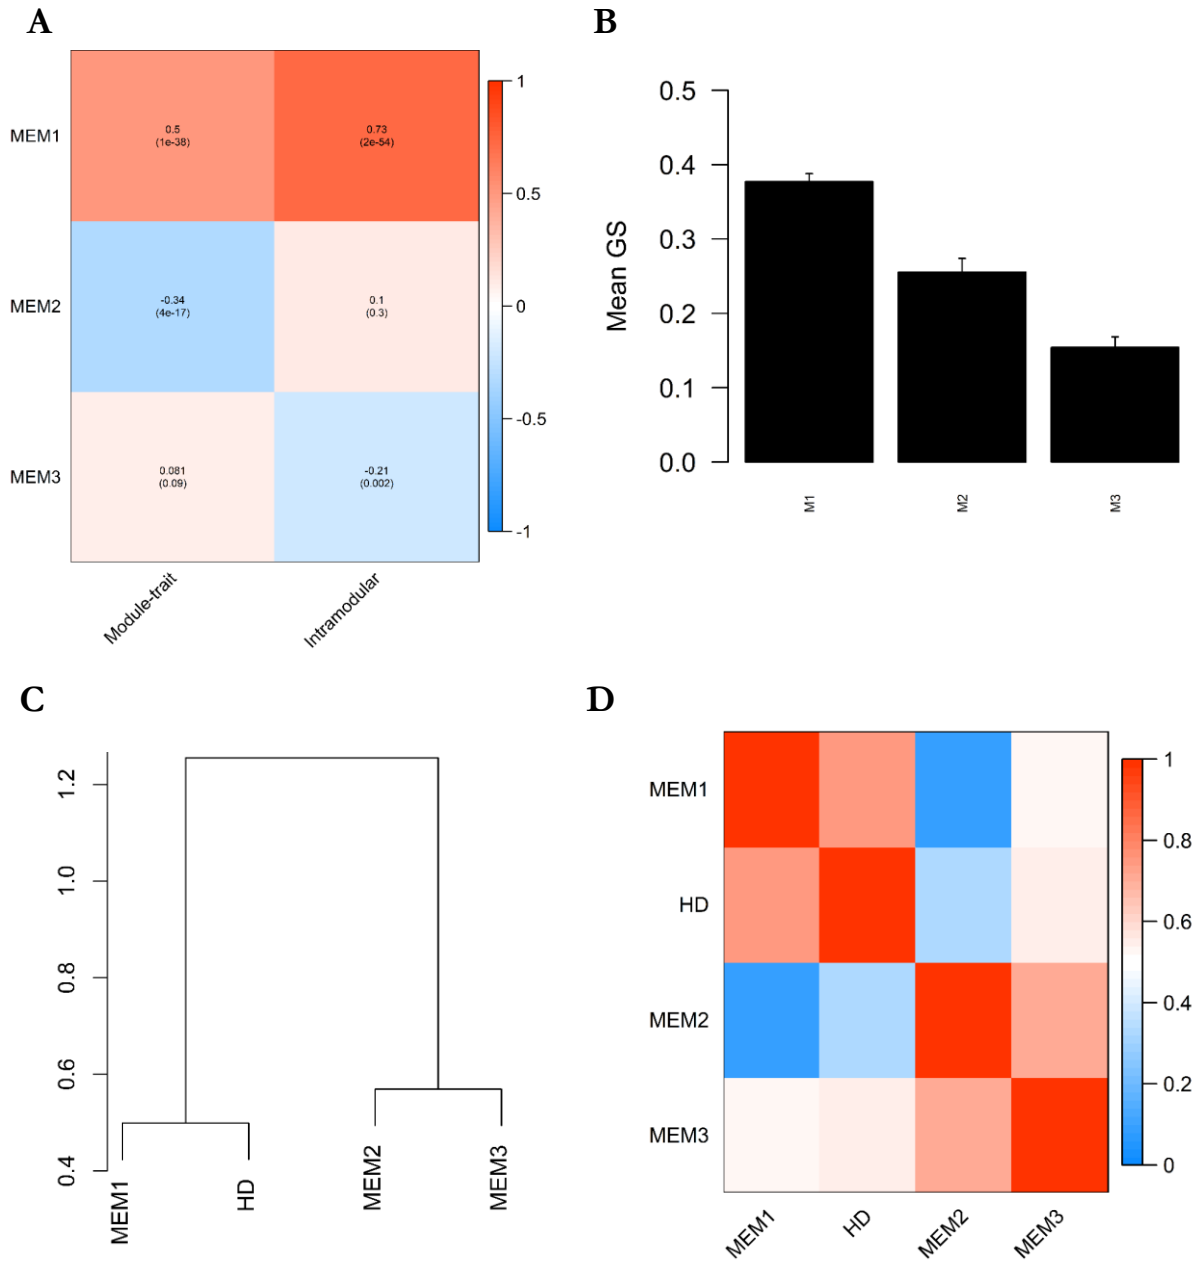

908

909

910

911

912

913

914

915

**Figure 2: Correlation of WGCNA meta-modules and the association of the disease state with module eigengenes.** A. Heatmap showing the correlation between the meta-module eigengenes (MEM1, MEM2, and MEM3), and disease state (HD) or between gene significance (GS) and meta-module membership. P-values adjusted after Benjamini & Yekutieli (Yekutieli & Benjamini, 2001) are given in brackets. B: Mean gene significance (GS) of each meta-module. Error bars depict the 95% confidence interval. C. Dendrogram showing hierarchical clustering of module eigengenes. D. Eigengene adjacency heatmap.

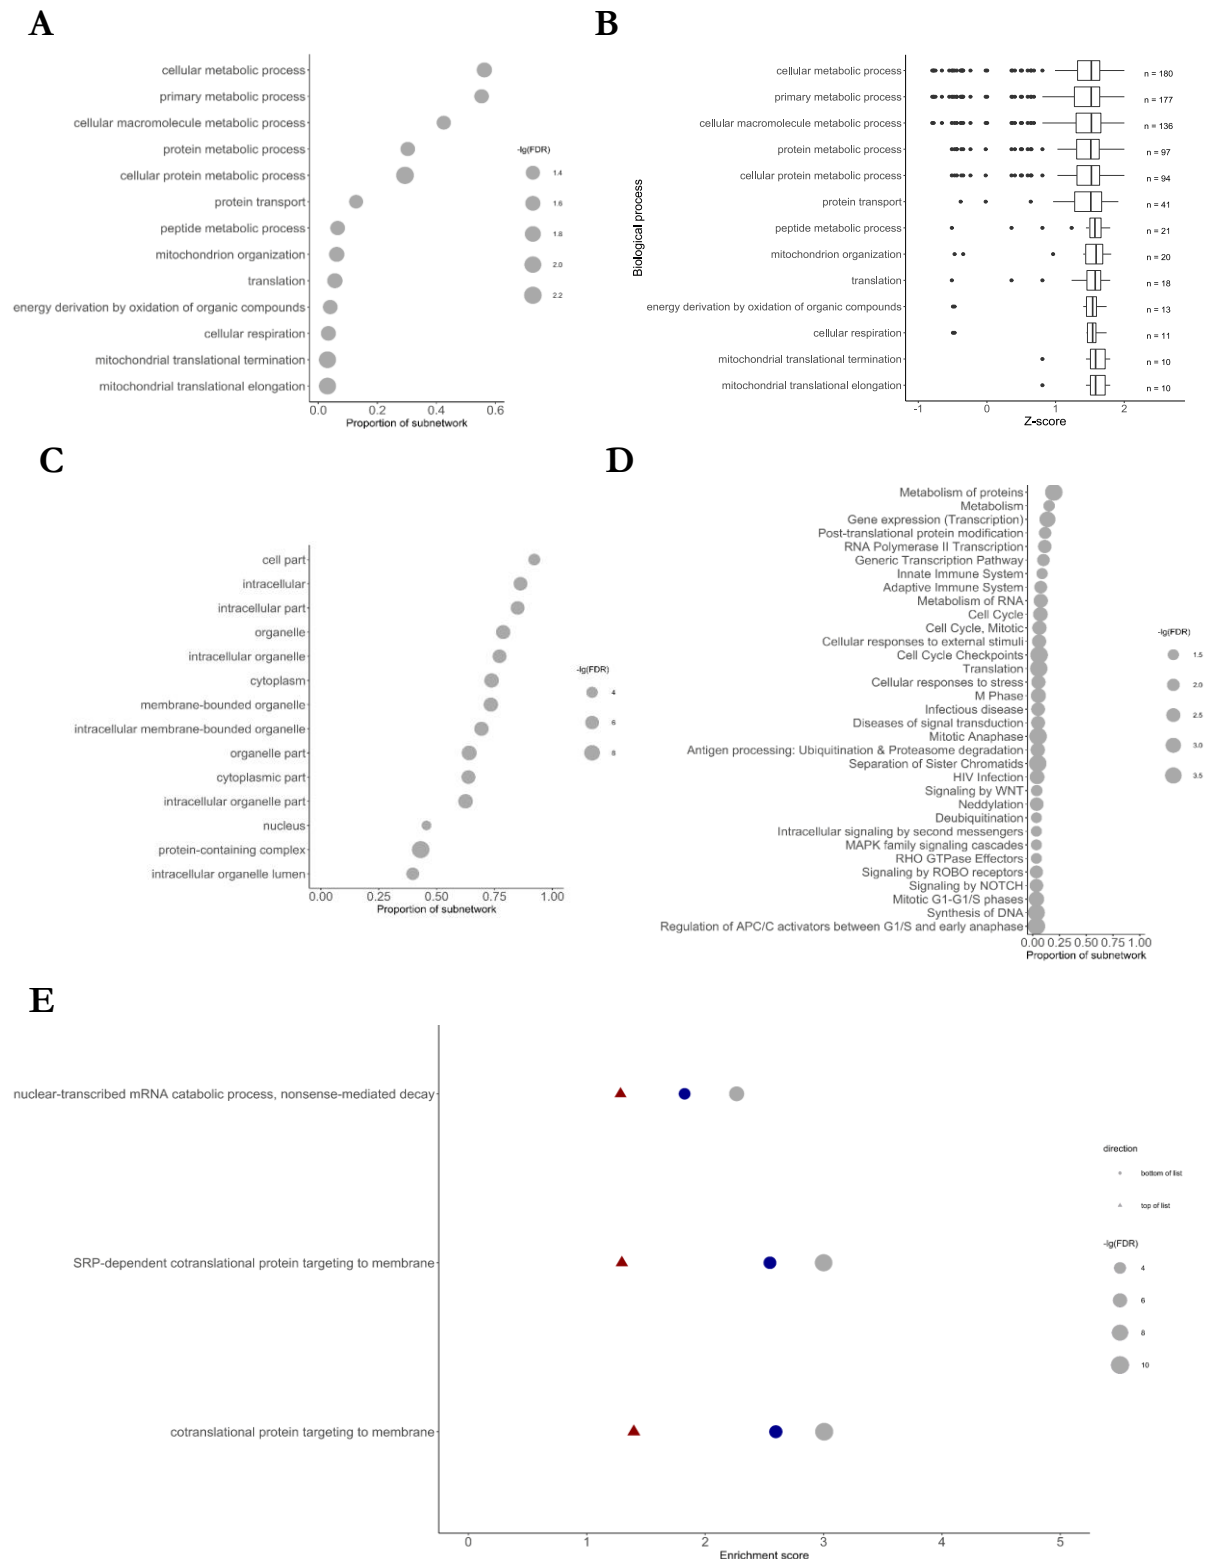

**Figure 3: Enrichment analysis of M1 subnetwork.** A: Gene ontology (GO) term enrichment analysis for biological processes. B: Mean Z-ratios of genes belonging to the enriched biological processes. C: Gene ontology (GO) term enrichment analysis for cellular compartments. D: Enrichment of Reactome pathways. The size of the circles depicts the negative decadic logarithm of the false-discovery rate (FDR). E: Result of gene set enrichment analysis against the gene ontology database. Only gene sets identified in each dataset (red: GSE33000; blue: GSE129473; grey: GSE64810) are shown and sets were ordered according to the score of the RRA analysis.

916  
917  
918  
919  
920  
921  
922  
923

924

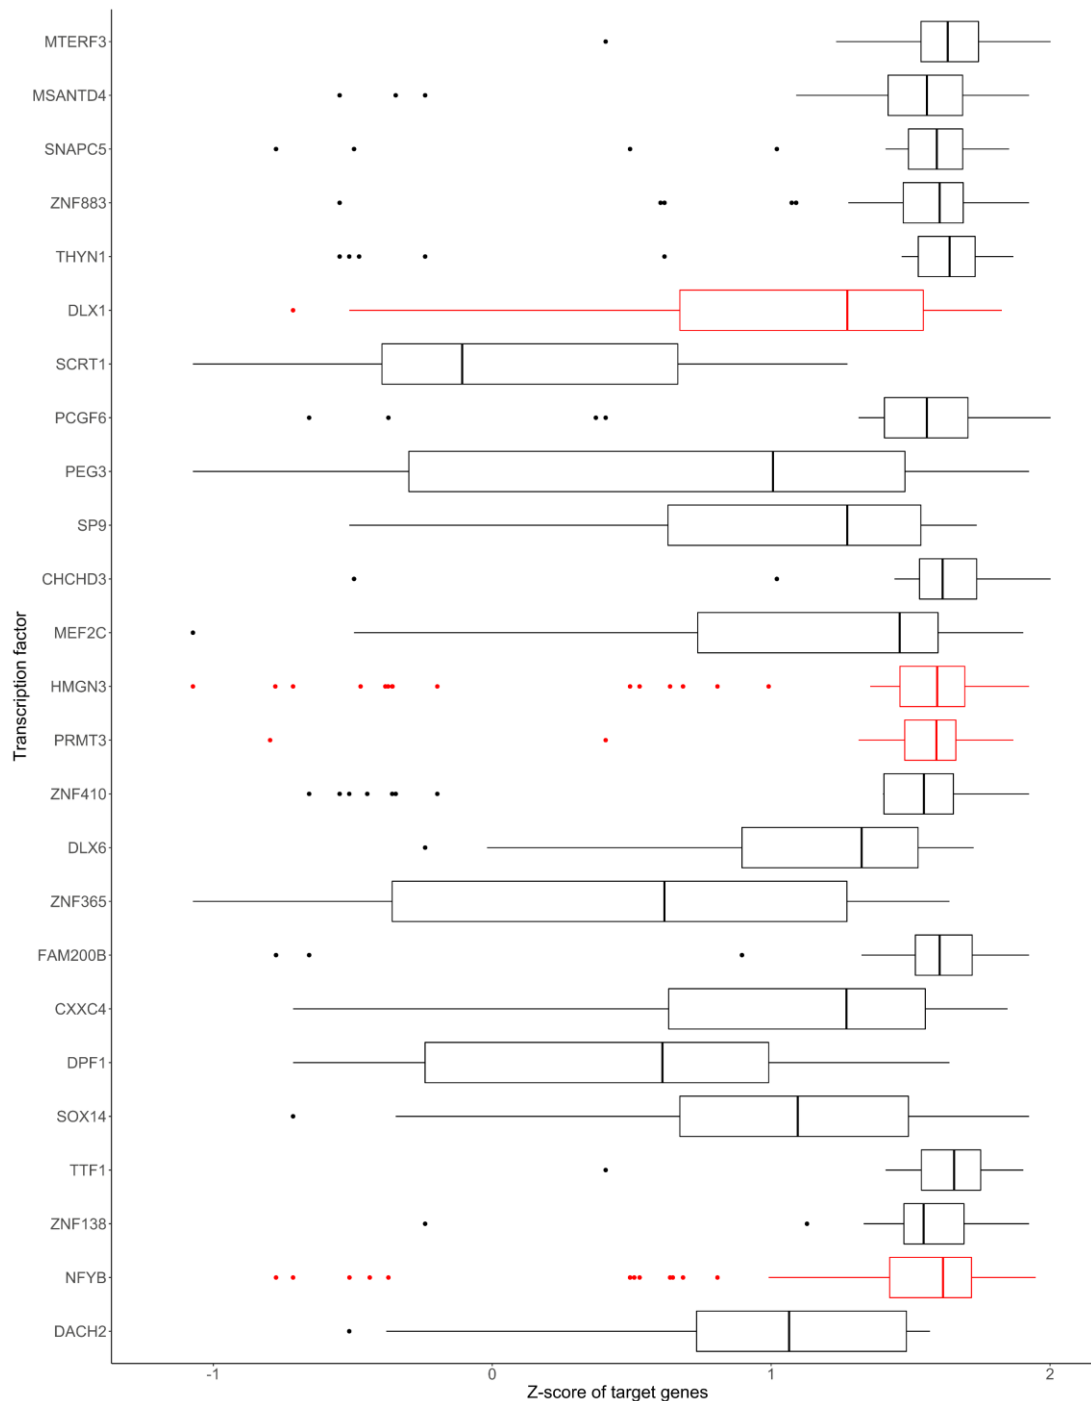

925

926 **Figure 4: Z-Scores of target genes from the top 25 enriched transcription factors.** Enrichment of  
927 transcription factors was computed with the ChEA3 tool and the Z-ratios for each gene of M1 controlled by  
928 the respective transcription factor was averaged for the three different studies. Transcription factors were  
929 ordered based on the result of the transcription factor enrichment analysis with the best-ranked transcription  
930 factor at the top of the graph and transcription factors with robustly altered mRNA levels were depicted in  
931 red.

932

933

934

935



A

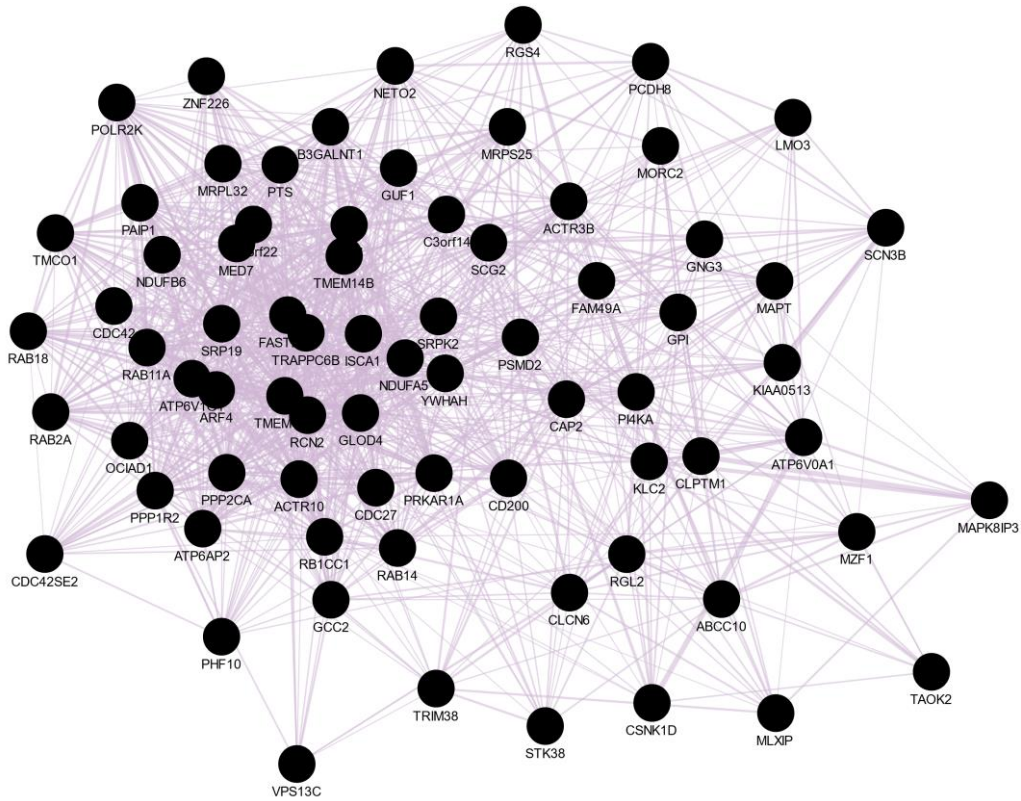

B

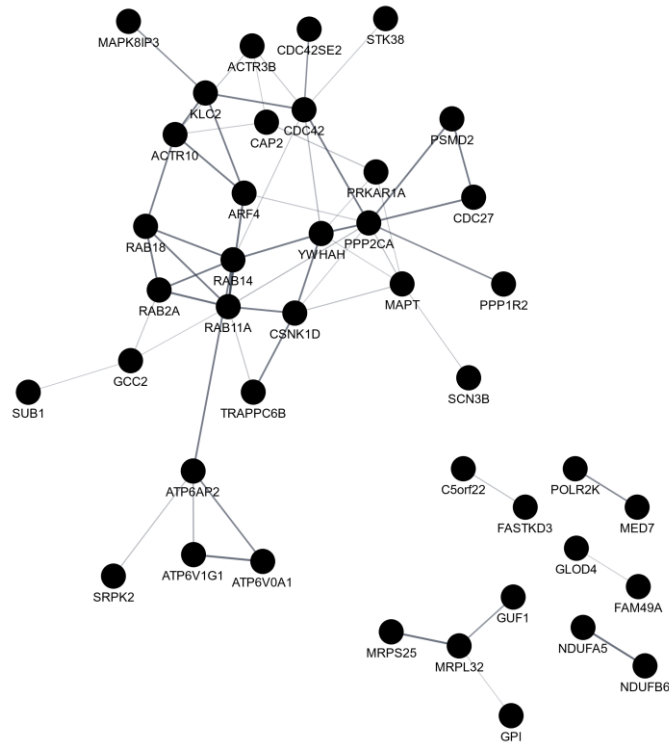

936

937

938

939

940

**Figure 5: Co-expression and protein-protein interaction network of genes altered in HD and PD. A.** Co-expression network. **B.** Protein-protein interaction network representing proteins that have at least one annotated interaction partner within the query. Networks were constructed with Cytoscape [80], its GeneMania [88] and STRING [28] plugins. List of differentially regulated genes in the brain of PD patients was retrieved from [37].

941

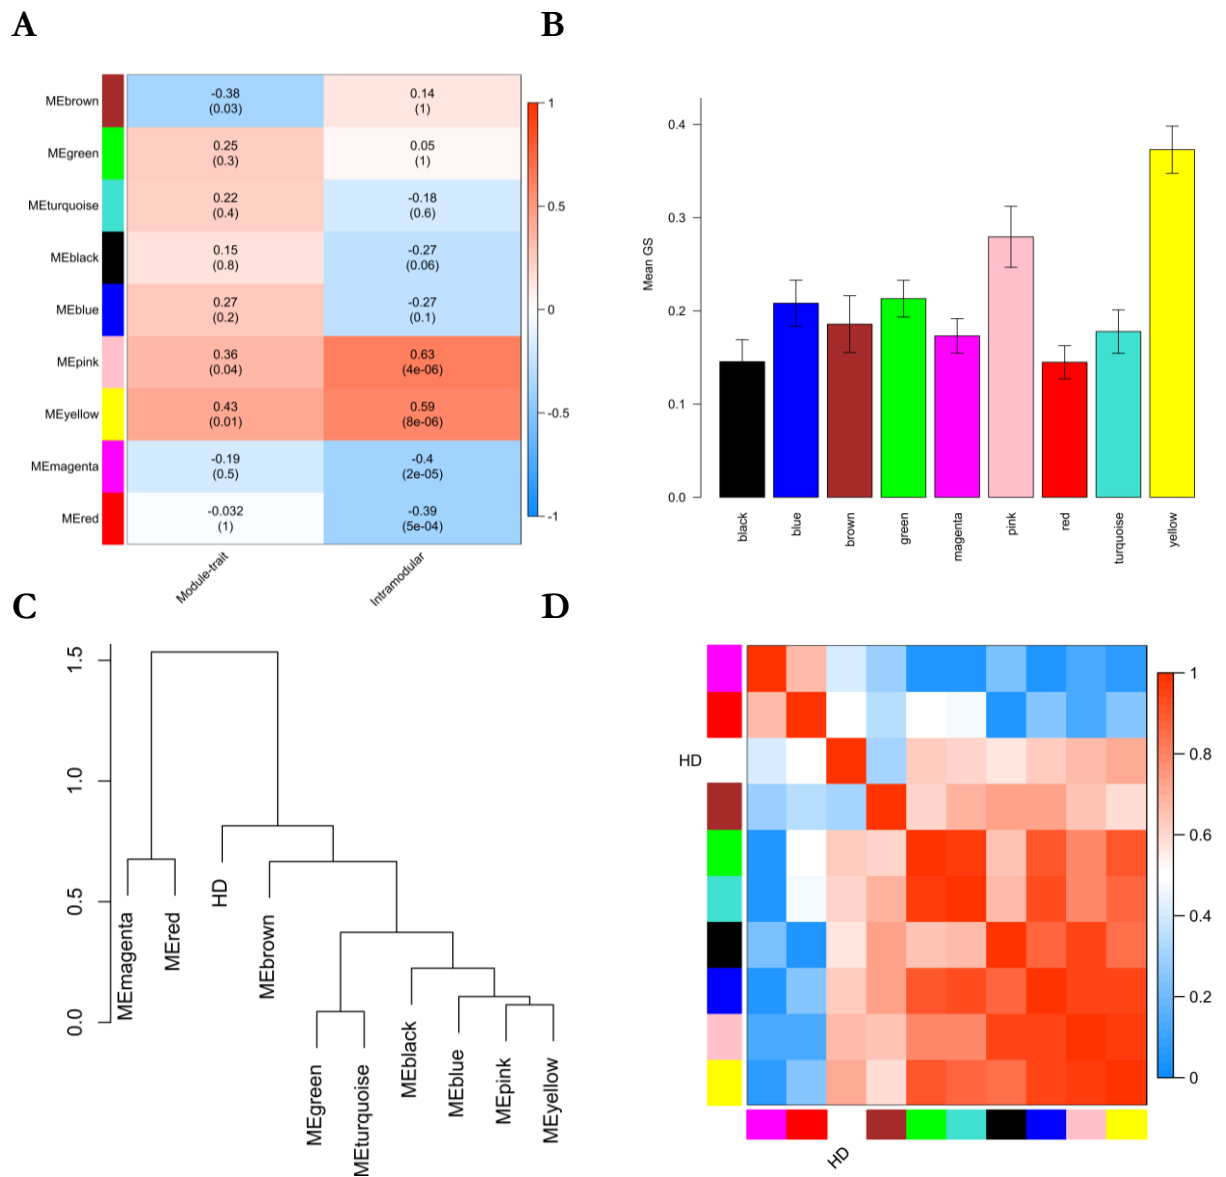

942

943 **Figure 6: Result of WGCNA analysis and the association of the disease state with module eigengenes.**

944 A. Heatmap showing the correlation between module and disease state or between gene significance and

945 module membership. P-values adjusted after Benjamini & Yekutieli (Yekutieli and Benjamini, 2001) are

946 given in brackets. B: Mean gene significance of each module. Error bars depict the 95% confidence interval.

947 C. Dendrogram showing hierarchical clustering of module eigengenes. D. Eigengene adjacency heatmap.

948

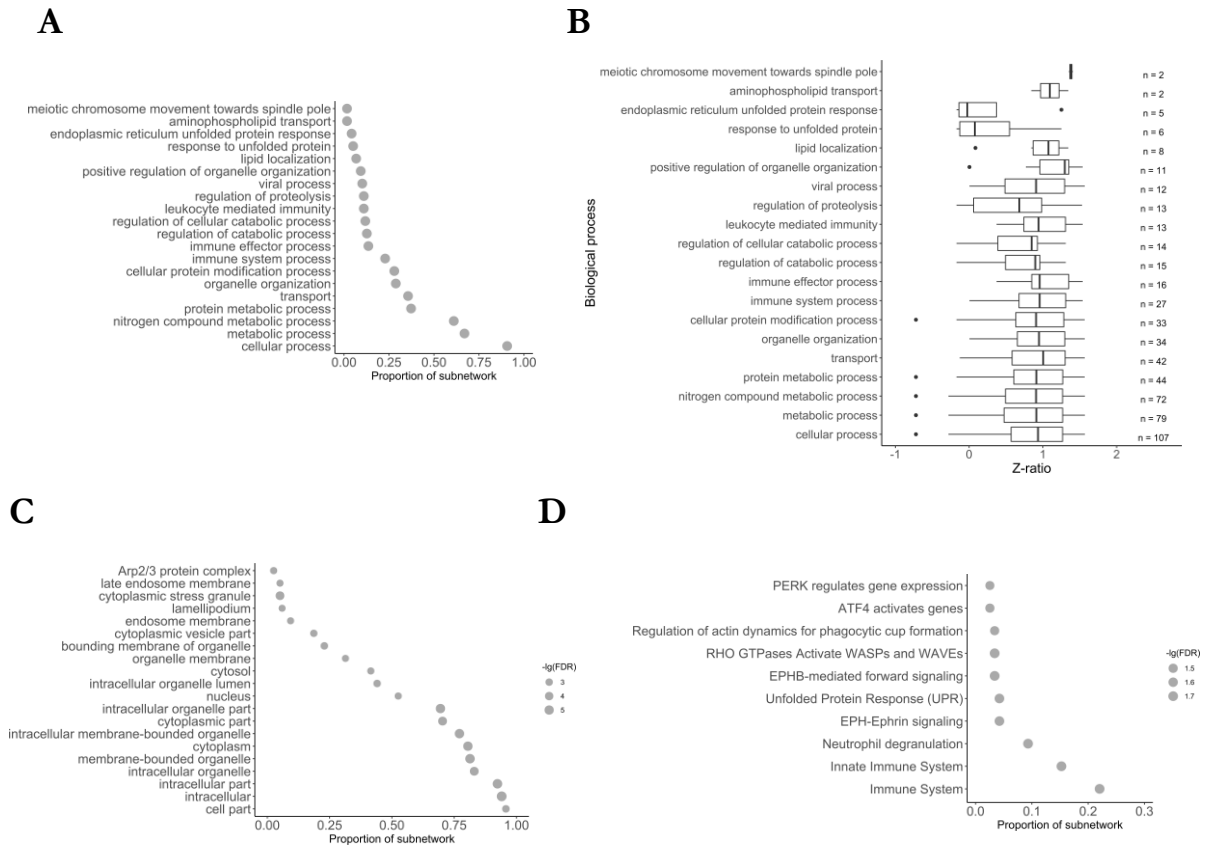

949

950 **Figure 7: Enrichment analysis of MB meta-module.** A: Gene ontology (GO) term enrichment analysis  
 951 for biological processes. B: Mean z-ratios of genes belonging to the enriched biological processes. C: Gene  
 952 ontology (GO) term enrichment analysis for cellular compartments. D: Enrichment of Reactome pathways.

953

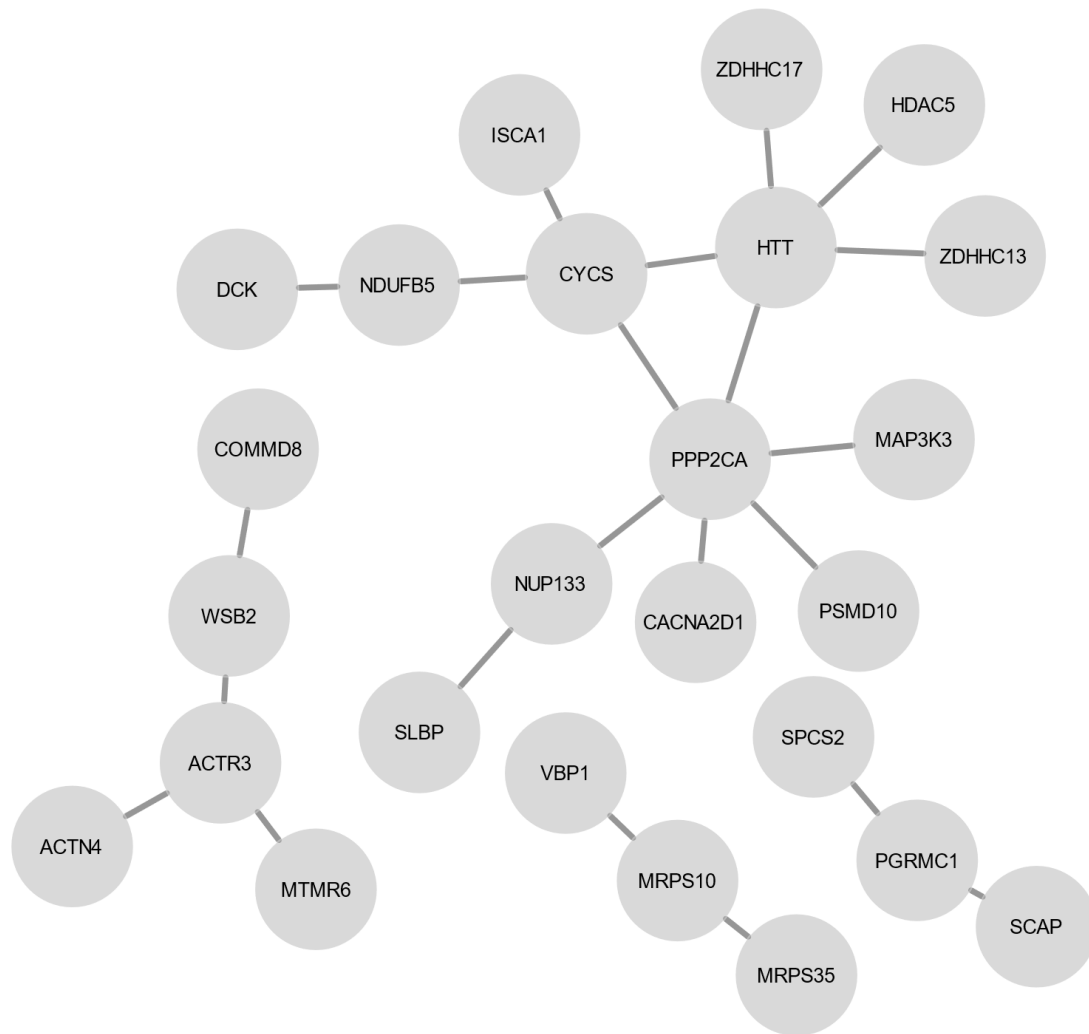

954

955 **Figure 8: Protein-protein interaction map of proteins with altered mRNA levels in the blood and**  
956 **brain of HD patients.** Protein-protein interaction map was constructed the STRING database and plotted  
957 with Cytoscape. For illustration purposes, we added HTT to the protein interaction map, although mRNA  
958 HTT were not robustly altered.

959

**A meta-analysis of transcriptomic profiles  
of 220 Huntington's disease patients  
highlights dysregulation of...**

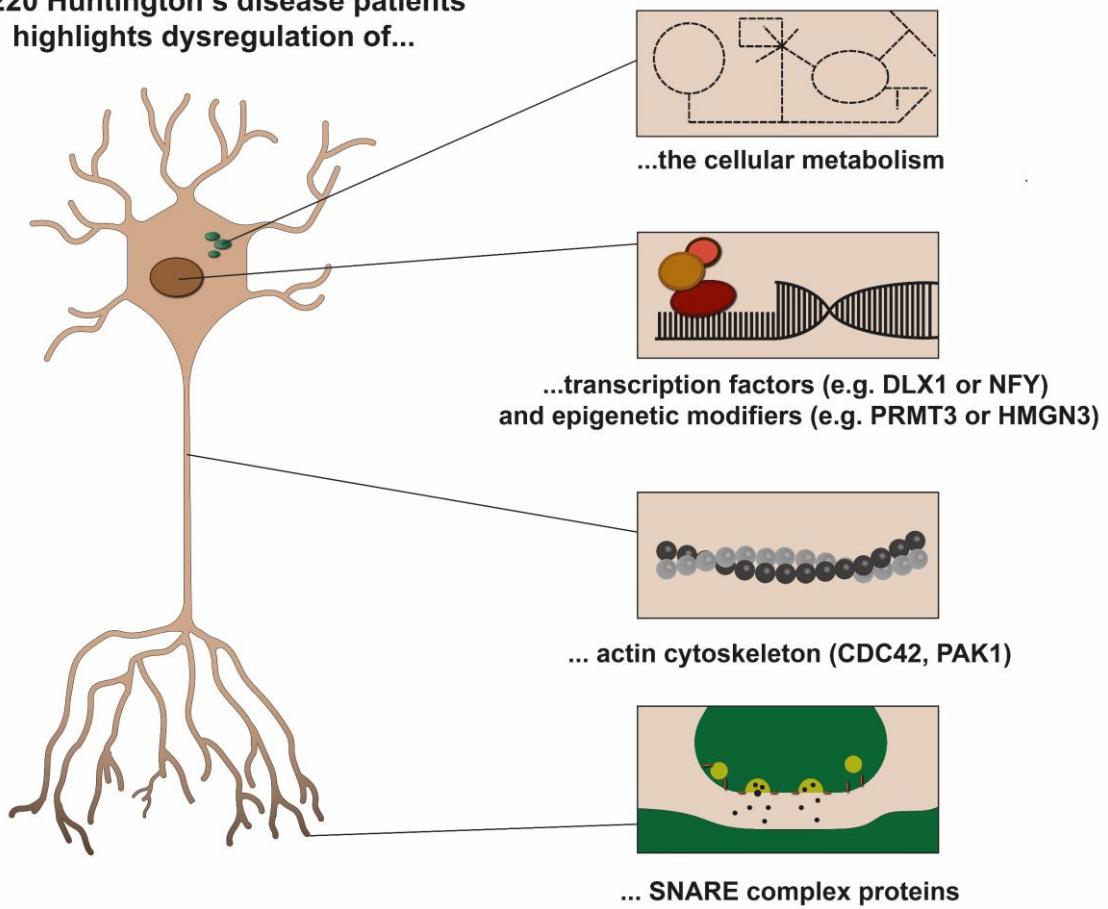

960

961

**Figure 9: Schematic illustration of transcriptomic alterations in the brain of HD patients.**

962

963

964

965 **Tables**

966 **Table 1: Information on patients from the analysed transcriptomic studies.** DLPC:

967 dorsolateral prefrontal cortex; BA: Broadmann area;

968

| <b>Accession number</b> | <b>No. HD patients</b> | <b>No. controls</b> | <b>Age (HD)</b> | <b>Age (Control)</b> | <b>Tissue</b>                    | <b>Reference</b> |
|-------------------------|------------------------|---------------------|-----------------|----------------------|----------------------------------|------------------|
| <b>GSE33000</b>         | 157                    | 157                 | 55.9 ± 14.32    | 63.5 ± 19.40         | DLPFC (BA9)                      | [16]             |
| <b>GSE129473</b>        | 11                     | 5                   | 61.0 ± 21.59    | 62.8 ± 27.43         | Caudate nucleus<br>/ DLPFC (BA9) | [13]             |
| <b>GSE64810</b>         | 20                     | 49                  | 58.25 ± 10.36   | 68.35 ± 15.83        | DLPFC (BA9)                      | [14,15]          |
| <b>GSE24250</b>         | 8                      | 6                   | NA              | NA                   | Venous cellular<br>whole blood   | [17]             |
| <b>GSE8762</b>          | 12                     | 10                  | 48.4 ± 11.76    | 50.08 ± 8.63         | Lymphocytes                      | [18]             |
| <b>GSE1751</b>          | 12                     | 14                  | NA              | NA                   | Venous whole<br>blood            | [19]             |

969

970 **Table 2: Top ten hub genes of meta-module M1.** Hub genes were determined based  
971 on their intramodular connectivity, module membership and gene significance as  
972 described in the methods section. A positive Z-score shows upregulation in HD samples,  
973 while a negative Z ratio shows a downregulation. The complete list of identified hub  
974 genes can be retrieved from the supplement. IC: intramodular connectivity; MM: module  
975 membership; GS: gene significance.

| Gene            | IC    | MM   | GS   | Z-ratio  | Z ratio   | Z ratio  |
|-----------------|-------|------|------|----------|-----------|----------|
|                 |       |      |      | GSE33000 | GSE129473 | GSE64810 |
| <b>C3orf14</b>  | 60.22 | 0.96 | 0.48 | 2.01     | 0.46      | 1.77     |
| <b>ATP6AP2</b>  | 59.31 | 0.95 | 0.42 | 1.72     | 1.05      | 1.77     |
| <b>ISCA1</b>    | 57.93 | 0.95 | 0.47 | 1.96     | 0.75      | 1.77     |
| <b>B3GALNT1</b> | 57.11 | 0.95 | 0.44 | 1.80     | 1.27      | 1.50     |
| <b>POLR2K</b>   | 54.55 | 0.94 | 0.49 | 1.98     | 1.44      | 2.30     |
| <b>PAK1</b>     | 54.65 | 0.92 | 0.44 | 2.07     | - 0.42    | 0.30     |
| <b>ACPI</b>     | 53.75 | 0.94 | 0.45 | 1.82     | 1.22      | 1.76     |
| <b>CDC42</b>    | 53.60 | 0.94 | 0.42 | 1.72     | 1.83      | 1.45     |
| <b>EID1</b>     | 53.22 | 0.93 | 0.44 | 1.75     | 1.11      | 2.20     |
| <b>RCN2</b>     | 52.24 | 0.93 | 0.43 | 1.75     | 1.48      | 1.95     |

976

977 **Additional files**

- 978 • **Additional file 1 (Excel file, .xlsx):** Genes with robustly altered mRNA levels in the brain and  
979 blood of HD patients.
- 980 • **Additional file 2 (Excel file, .xlsx):** Selection of the soft-thresholding power  $\beta$ .
- 981 • **Additional file 3 (Excel file, .xlsx):** Result of neat analysis
- 982 • **Additional file 4 (Excel file, .xlsx):** Identified WGNA hub genes.
- 983 • **Additional file 5 (Excel file, .xlsx):** Hubs of protein-protein interaction networks.
- 984 • **Additional file 6 (Excel file, .xlsx):** Results of transcription factor enrichment analysis.
- 985 • **Additional file 7 (Excel file, .xlsx):** List of genes altered upon HD, PD and AD.
- 986 • **Additional file 8 (Excel file, .xlsx):** CREB-1 transcription factor subnetwork.
- 987 • **Additional file 9 (Excel file, .xlsx):** Alteration of mRNA levels in the striatum of R6/2 and  
988 YAC128 mice.
- 989 • **Additional file 10 (Excel file, .xlsx):** Results of ROC analysis of selected genes and  
990 transcriptional regulators.
- 991 • **Additional file 11 (Portable Document Format, .pdf):** ROC curves of selected hub genes and  
992 transcriptional regulators.
